# Supplementary material for: Unveiling the spatially confined oxidation processes in reactive electrochemical membranes
Source: PubMed Central journal article supplement (PMC10584896; doi:10.1038/s41467-023-42224-3), 2023-10-18
Supplement: 41467_2023_42224_MOESM1_ESM.pdf [file 41467_2023_42224_MOESM1_ESM.pdf]

1  
2  
3  
4  
5  
6  
7  
8  
9  
10  
11  
12  
13  
14  
15  
16  
17  
18  
19

## Supplementary Information

### Unveiling the spatially confined oxidation processes in reactive electrochemical membranes

Yuyang Kang, Zhenao Gu<sup>\*</sup>, Baiwen Ma, Wei Zhang, Jingqiu Sun, Xiaoyang Huang, Chengzhi Hu, Wonyong Choi, Jiuhui Qu<sup>\*</sup>

\*Corresponding authors: Zhenao Gu and Jiuhui Qu  
Email: zagu@rcees.ac.cn (Z.G.), or jhqu@rcees.ac.cn (J.Q.)

This file includes:

- Supplementary Methods
- Supplementary Figures 1 to 38
- Supplementary Tables 1 to 4
- Supplementary References

## 20 **Supplementary Methods**

### 21 **Chemicals and Materials**

22 Sodium sulfate ( $\text{Na}_2\text{SO}_4$ ,  $\geq 99\%$ ), hydrochloric acid ( $\text{HCl}$ , 36%–38%), terephthalic acid (TA,  $\geq 99\%$ ),  
23 formic acid ( $\geq 98\%$ ), potassium ferrocyanide trihydrate ( $\text{K}_4\text{Fe}(\text{CN})_6 \cdot 3\text{H}_2\text{O}$ ,  $\geq 99.5\%$ ), potassium  
24 ferricyanide ( $\text{K}_3\text{Fe}(\text{CN})_6$ ,  $\geq 99.5\%$ ), and sodium perchlorate monohydrate ( $\text{NaClO}_4 \cdot \text{H}_2\text{O}$ ,  $\geq 99\%$ )  
25 were purchased from Sinopharm (China); 4-chlorophenol (4-CP,  $\geq 99\%$ ) and 2,4,6-trichlorophenol  
26 ( $\geq 98\%$ ) were purchased from Adamas (China). Tert-butyl alcohol (TBA,  $\geq 99.5\%$ ), and 7-  
27 hydroxycoumarin (7-OH COU,  $\geq 99\%$ ) were purchased from Aladdin (China); 2-  
28 hydroxyterephthalic acid (HTA,  $\geq 97\%$ ) and 5,5-dimethyl-1-pyrroline N-oxide (DMPO,  $\geq 97\%$ )  
29 were purchased from Ark Pharm. Citric acid monohydrate ( $\geq 99.5\%$ ) was purchased from Psaitong  
30 (China). Coumarin (COU,  $\geq 99\%$ ) and o-cresol ( $\geq 99\%$ ) were purchased from Tokyo Chemical  
31 Industry Co., Ltd. Acetonitrile (HPLC grade) and methanol (HPLC grade) were purchased from  
32 Fisher Scientific.

### 33 **Analysis Methods**

34 The concentrations of 4-CP and o-cresol were measured by high-performance liquid  
35 chromatography (HPLC, Agilent 1260) with a C18 column ( $4.6 \times 250$  mm,  $5.0 \mu\text{m}$ ), and the UV  
36 detector was set to be 281 nm. Isocratic elution was used with water and methanol ( $v/v = 40/60$ ) as  
37 the mobile phase at a flow rate of  $0.5 \text{ ml min}^{-1}$ . TA was measured by HPLC at 265 nm with 0.01%  
38 aqueous formic acid and methanol ( $v/v = 40/60$ ) as the mobile phase. HTA, the fluorescent adduct  
39 product of TA attacked by  $\bullet\text{OH}$ , was analyzed by HPLC with a fluorescent detector at  $\lambda_{\text{ex}} = 315$  nm  
40 and  $\lambda_{\text{em}} = 425$  nm using the same mobile phase as TA. COU was measured by HPLC at 280 nm  
41 with 0.01% aqueous formic acid and methanol ( $v/v = 50/50$ ) as the mobile phase. 7-OH COU, the  
42 fluorescent adduct product of COU attacked by  $\bullet\text{OH}$ , was analyzed by HPLC with a fluorescent  
43 detector at  $\lambda_{\text{ex}} = 332$  nm and  $\lambda_{\text{em}} = 471$  nm using the same mobile phase as COU. In addition, 2,4,6-  
44 trichlorophenol was measured by HPLC at 295 nm with 0.01% aqueous formic acid and methanol  
45 ( $v/v = 20/80$ ) as the mobile phase. Citric acid was measured by HPLC at 210 nm with 5 mM aqueous  
46 sulfuric acid and methanol ( $v/v = 96/4$ ) as the mobile phase.

### 47 **Energy Consumption Calculation**

48 The mineralization current efficiency (MCE) for 4-CP degradation was calculated according to  
49 Supplementary equation (1)<sup>1</sup>,

$$50 \quad MCE = \frac{TOC_0 - TOC_t}{1.2 \times 10^4 x It} nFV \times 100\% \quad (1)$$

51 where  $TOC_0$  and  $TOC_t$  are the values of total organic carbon (TOC, mg C L<sup>-1</sup>) at the beginning and  
52 time  $t$ , respectively.  $x$  is the number of carbon atoms in a 4-CP molecule,  $I$  is the applied current  
53 (A),  $n$  is the theoretical number of electrons for complete mineralization (estimate to be 26 for 4-  
54 CP),  $F$  is the Faraday constant (96,485 C mol<sup>-1</sup>), and  $V$  is the volume of the solution (L).

55 The total energy consumption was calculated as the sum of electrical energy ( $E_E$ , kWh m<sup>-3</sup>) and  
56 pumping energy ( $E_P$ ) normalized per log removal of 4-CP. The  $E_E$  value was calculated according  
57 to Supplementary equation (2)<sup>2</sup>,

$$58 \quad E_E = 10^{-3} \times \frac{V_{\text{cell}} I}{Q} \quad (2)$$

59 where  $V_{\text{cell}}$  is the cell potential (V),  $I$  is the current used in the experiment (i.e., 2.54 cm<sup>2</sup> × 19.7  
60 mA cm<sup>-2</sup> × 10<sup>-3</sup> = 0.05 A),  $Q$  is the volumetric flow rate at which 90% 4-CP removal was  
61 achieved (m<sup>3</sup> h<sup>-1</sup>).

62 The  $E_P$  value was calculated by Supplementary equation (3)<sup>2</sup>,

$$63 \quad E_P = 3.6 \times 10^{-5} \times \frac{\rho g \Delta P}{\eta} \quad (3)$$

64 where  $\rho$  is the density of water (997 kg m<sup>-3</sup>),  $g$  is the gravitational constant (9.81 m s<sup>-2</sup>),  $\Delta P$  is the  
65 transmembrane pressure at a given flow rate (bar), and  $\eta$  is the pump efficiency (assumed as 0.7).

## 66 **Finite Element Simulation**

67 The finite element analysis was simulated using COMSOL Multiphysics 5.3a. Microchannels with  
68 diameters of 7.3 μm, 17.5 μm, 45.0 μm, and 105.0 μm were modeled, respectively. The channel  
69 length was set to be 3 mm, which is the same as the thickness of REMs. The numbers of channels  
70 were estimated to be 239, 56, 12, and 3 for the four diameters, respectively, based on the porosity  
71 of REMs (Supplementary Table 3), which is a significant factor that influence the surface potential  
72 distribution in porous electrode<sup>3</sup>.

73 The 3D geometry “CFD” module was used to solve the flow velocity and streamline distribution  
74 in the microchannels. The solution was distributed into reactive channels in the inlet region and get  
75 degraded in the zone near the channel surface (Supplementary Fig. 26). The range of hydraulic  
76 residence time (HRT) in the simulation (2.7–54.5 s) was consistent with the experiment (2.7–54.5  
77 s). The “transport of diluted species” module was used to solve the concentration distribution. The  
78 mathematical model of the mass transfer process includes Fick’s law, the convection process, and  
79 the reaction process. As we mainly simulated the mass transfer process of neutral molecules inside  
80 the anode and 0.33 M NaClO<sub>4</sub> electrolyte was used during experiments, the electrostatic migration

81 term was not included in the model<sup>4</sup>. As the current density is influenced by the depth of channel<sup>5,6</sup>,  
 82 the “secondary current distribution” module was used to investigate the current distribution ( $\mathbf{j}(x)$ ,  
 83 A m<sup>-2</sup>) in the flow-through system. The Butler-Volmer equation was used to solve for the current  
 84 distribution (Supplementary equation (4))<sup>7</sup>,

$$85 \quad i = F A k^0 [e^{-\alpha f(E-E^0)} - e^{(1-\alpha)f(E-E^0)}] \quad (4)$$

86 where  $i$  is the local current (A),  $F$  is the faraday constant (C mol<sup>-1</sup>),  $A$  is the surface area of  
 87 electrode (m<sup>2</sup>),  $k^0$  is the standard rate constant (m s<sup>-1</sup>),  $\alpha$  is the transfer coefficient,  $f = \frac{F}{RT}$ ,  $E^0$  is  
 88 the formal potential (V), and  $E$  is the electrode potential (V).

89 The applied current ( $i_{app}$ , A) (Fig. 4b) was determined according to the porosity and current in the  
 90 experiment (Supplementary equation (5)),

$$91 \quad i_{app} = I \frac{S}{pA} \quad (5)$$

92 where  $I$  is the current in the experiment (0.05 A unless otherwise mentioned),  $p$  is the porosity of  
 93 REM,  $A$  is the geometry surface area of the electrode ( $2.54 \times 10^{-4}$  m<sup>2</sup>), and  $S$  (m<sup>2</sup>) is the cross-  
 94 section area of the simulated channel.

95 The inner surface of channels was defined as the reaction surface. For simplicity, the generation of  
 96 •OH in the region with a potential lower than 2.8 V<sub>RHE</sub> was ignored<sup>8,9</sup>. In the region with a potential  
 97 higher than 2.8 V<sub>RHE</sub>, the production of •OH ( $r_{g,\bullet OH}$ , mol m<sup>-2</sup> s<sup>-1</sup>) is expressed in terms of current  
 98 density by Supplementary equation (6)<sup>4,10</sup>,

$$99 \quad r_{g,\bullet OH} = k_{g,\bullet OH} \frac{j(x)}{F} \quad (6)$$

100 where  $k_{g,\bullet OH}$  (dimensionless) was estimated using a TA degradation experiment (Supplementary  
 101 Fig. 34),  $j(x)$  is the local current density (A m<sup>-2</sup>).

102 Similar to the •OH production, a surface reaction kinetic equation was used to model the direct  
 103 electron transfer (DET) reaction and the flux of reactants at the electrode surface<sup>11</sup> (Supplementary  
 104 equation (7)),

$$105 \quad r_{4-CP,DET} = k_{f,4-CP} N_D c_{4-CP} = k_{4-CP,DET} \frac{j(x)}{F} c_{4-CP} \quad (7)$$

106 Where  $k_{f,4-CP}$  represents the forward rate constant of 4-CP DET reaction,  $N_D$  is the number of  
 107 reaction sites per unit of surface area, and  $c_{4-CP}$  is the concentration of 4-CP in the electrode  
 108 surface. Additionally,  $k_{4-CP,DET}$ , the rate constant (m<sup>3</sup> mol<sup>-1</sup>), was optimized in the simulation.

109 Here it is assumed that the DET reaction does not compete for active sites with the production of  
 110  $\bullet\text{OH}$  and the DET reaction is chemically irreversible<sup>11</sup>. It is also assumed that the number of surface  
 111 sites for the DET reaction is directly proportional to the current density.

112 Other reactions were defined as follows:

| No. | Reactions                                                                                        | Rate constants                               |
|-----|--------------------------------------------------------------------------------------------------|----------------------------------------------|
| 1   | $\bullet\text{OH} + 4 - \text{CP} \rightarrow 4 - \text{CP}_{\text{products}}$                   | $k_{4-\text{CP}, \bullet\text{OH}}$          |
| 2   | $\bullet\text{OH} + \bullet\text{OH} \rightarrow \text{H}_2\text{O}_2$                           | $k_{\bullet\text{OH}, \bullet\text{OH}}$     |
| 3   | $\bullet\text{OH} + 4 - \text{CP}_{\text{products}} \rightarrow 4 - \text{CP}_{\text{products}}$ | $k_{4-\text{CP products}, \bullet\text{OH}}$ |

113 The mineralization of most organic substances is a multi-step oxidation process and involves a  
 114 large quantity of  $\bullet\text{OH}$ <sup>12-14</sup>. For this reason, the intermediate products are set to be accumulated and  
 115 would not be consumed in the whole oxidation process.

116 The simulation of HTA production was conducted in a similar manner, where the same HRT as the  
 117 experiment (2.7 s) was used. The kinetic constant was set to be  $4.4 \times 10^6 \text{ m}^3 \text{ s}^{-1} \text{ mol}^{-1}$ <sup>8</sup>. The value  
 118 of the percent yield was set to be 8.8% (Supplementary Fig. 28). DET reaction was not taken into  
 119 consideration in the simulation.

120 **All parameters and values used in the simulation are shown in Supplementary Table 4.** When  
 121 the simulation was performed at different parameter values (e.g., pore size and applied current), all  
 122 other parameters remained unchanged.

123

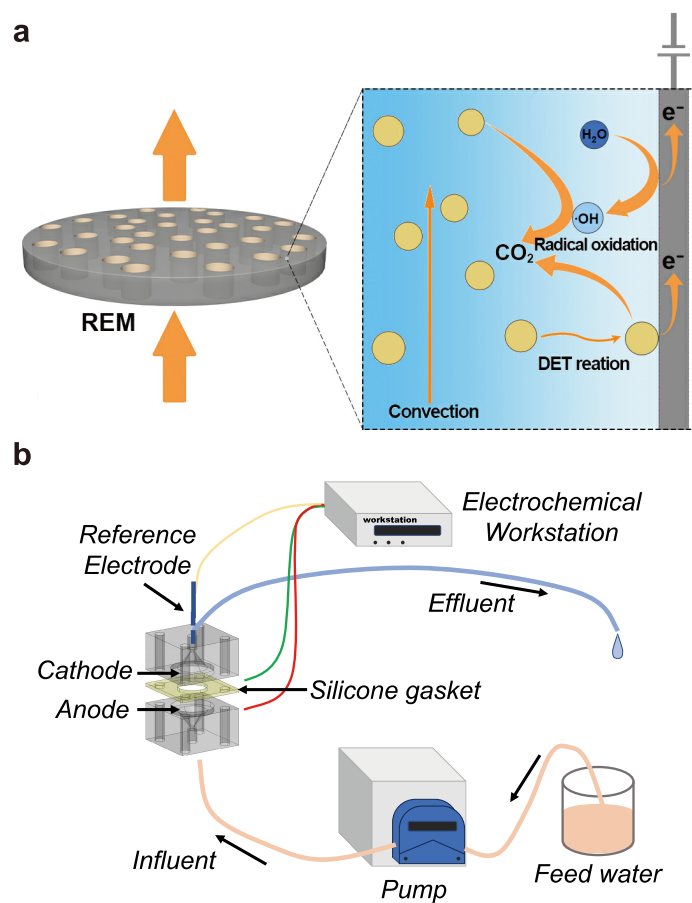

124

125 **Supplementary Fig. 1. Schematics of the REMs and single-pass filtration system.** **a** Schematic  
 126 of the reaction process in the microchannels. **b** The dead-end filtration assembly used to conduct  
 127 all the electrochemical experiments, where the membrane flux was controlled by a peristaltic pump.  
 128 The thickness of REMs is 3 mm. The gasket possesses a circular hole with a diameter of 18 mm  
 129 to allow for the water flow.

130

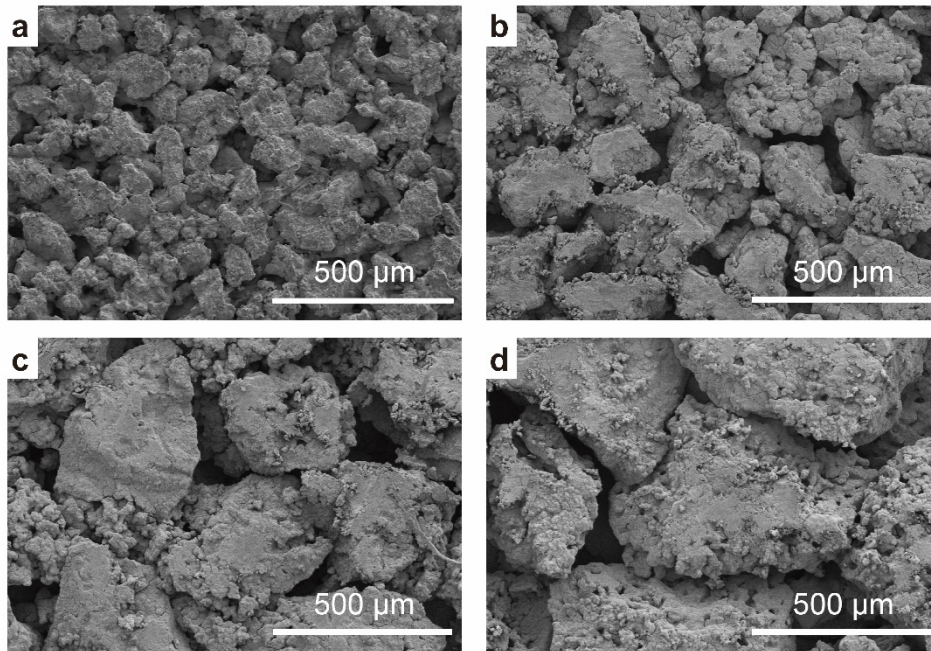

131

132 **Supplementary Fig. 2. Macroscopic pores in REMs. a-d** SEM images (top view) of **(a)** REM<sub>7μm</sub>,  
133 **(b)** REM<sub>17μm</sub>, **(c)** REM<sub>45μm</sub>, and **(d)** REM<sub>105μm</sub>.

134

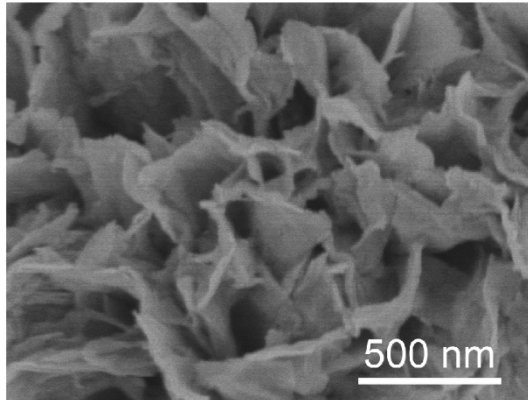

135

136 **Supplementary Fig. 3. Enlarged SEM image of REMs.** TiO<sub>2</sub> nanosheets with a length of 0.5 μm  
137 and a thickness of approximately 20 nm were densely grown on Ti substrates.

138



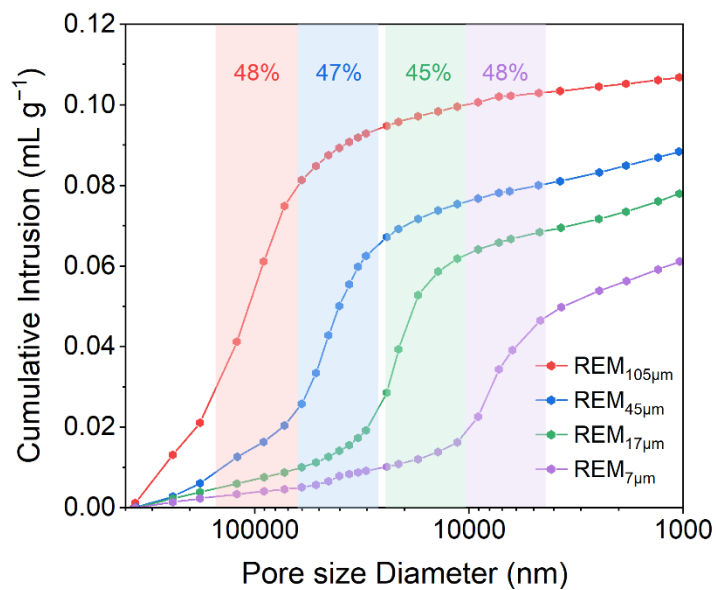

139

140 **Supplementary Fig. 4. The pore size distribution of REMs by mercury intrusion method.** The  
 141 predominant pore sizes in the REMs were 7, 17, 45, and 90 – 120 μm, respectively. These electrodes  
 142 are denoted as REM<sub>7μm</sub>, REM<sub>17μm</sub>, REM<sub>45μm</sub>, and REM<sub>105μm</sub>, respectively. Note that REM<sub>105μm</sub> was  
 143 denoted using the arithmetic mean of the two predominant pore sizes. Over 45% of the total pore  
 144 volume falls within the ±40% range around the predominant size, indicating that the selected pore  
 145 sizes are representative.

146

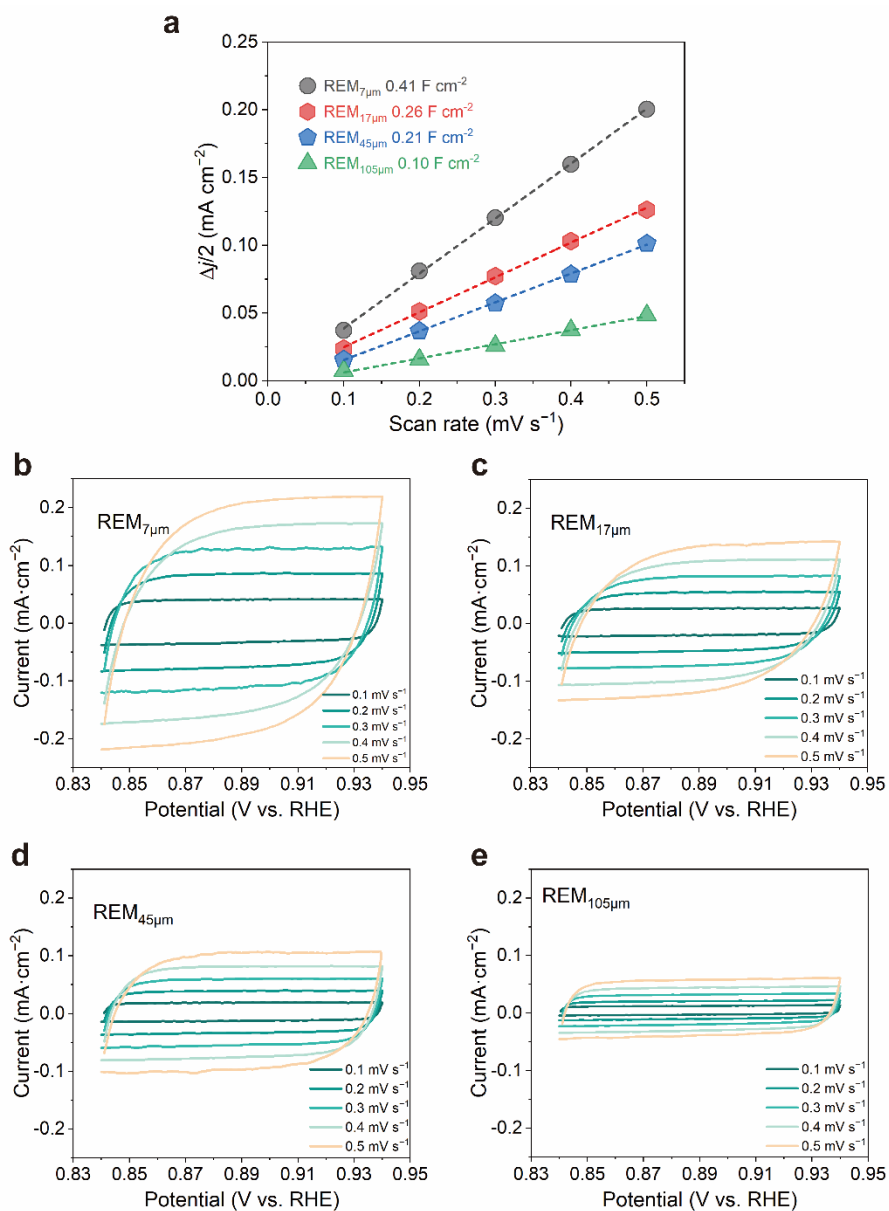

147

148 **Supplementary Fig. 5. The electrical double-layer capacitance ( $C_{dl}$ ) and corresponding cyclic**  
 149 **voltammetry (CV) curves of different REMs. a**  $C_{dl}$  by plotting current variation against the scan  
 150 rate to fit a linear regression. **b-e** Cyclic voltammetry (CV) curves of **(b)** REM<sub>7µm</sub>, **(c)** REM<sub>17µm</sub>, **(d)**  
 151 REM<sub>45µm</sub>, and **(e)** REM<sub>105µm</sub>.  $C_{dl}$  values were measured at the potential of 0.89 V vs. RHE.  
 152 Electrolyte: 0.33 M NaClO<sub>4</sub>. Note that  $C_{dl}$  value is proportional to the electrochemically active  
 153 surface area. This result is well consistent with the Brunauer–Emmett–Teller (BET) surface  
 154 area (Supplementary Table 1), which was used for the analysis in this study.

155

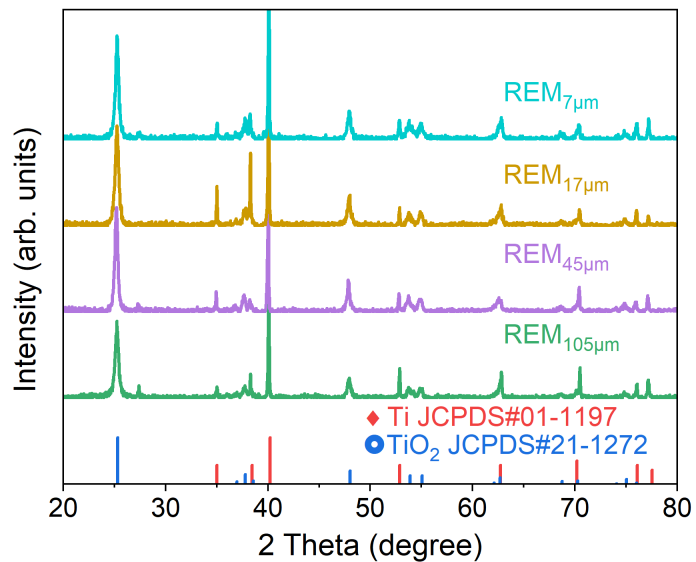

156

157 **Supplementary Fig. 6. XRD patterns of the REMs.** The diffraction peaks at 35.0°, 38.4°, and  
158 40.2° correspond to the metallic Ti substrate (JCPDS#01-1197)<sup>15</sup>. The distinct peaks at 25.3° and  
159 48.0° can be well indexed to the (101) and (200) planes of anatase TiO<sub>2</sub> (JCPDS#21-1272)<sup>16</sup>,  
160 respectively.

161

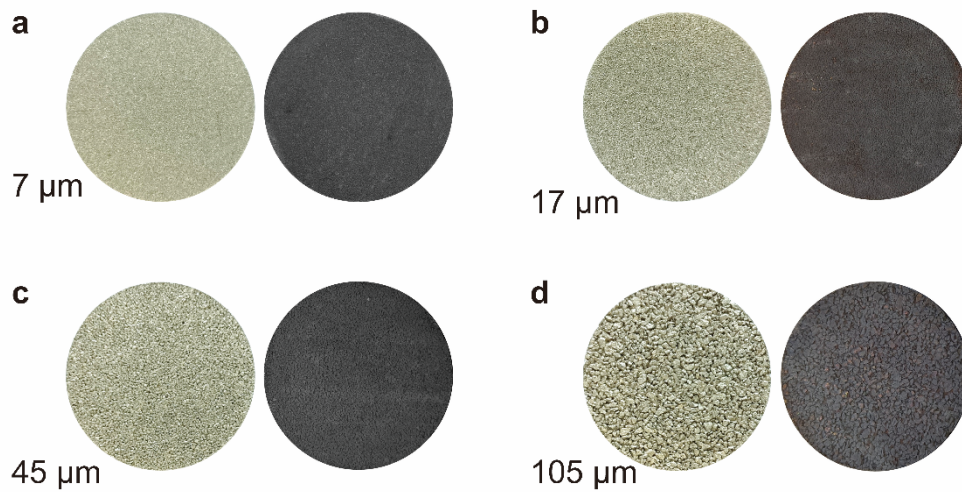

162

163 **Supplementary Fig. 7. Optical photographs of Ti substrates (left) and the corresponding**  
164 **REMs (right). a REM<sub>7μm</sub>, b REM<sub>17μm</sub>, c REM<sub>45μm</sub>, and d REM<sub>105μm</sub>.**

165

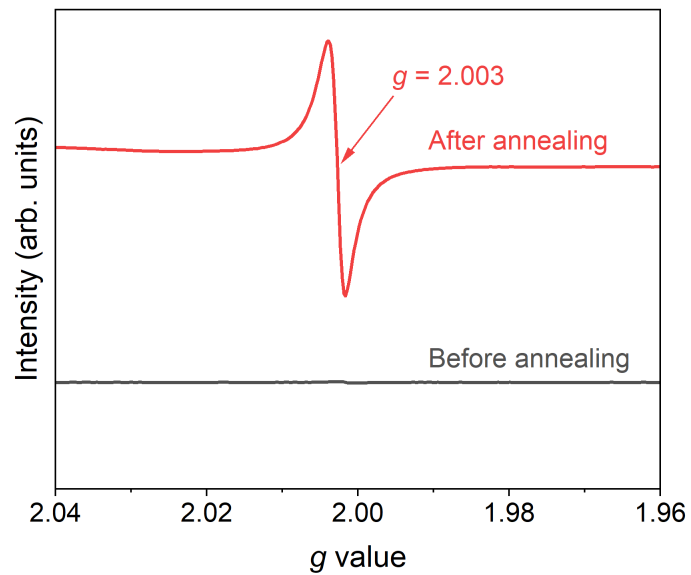

166

167 **Supplementary Fig. 8. ESR spectra of REM<sub>7µm</sub> before and after annealing in the argon**  
168 **atmosphere.** The signal at  $g = 2.003$  is a typical sign of oxygen vacancies<sup>16</sup>.

169

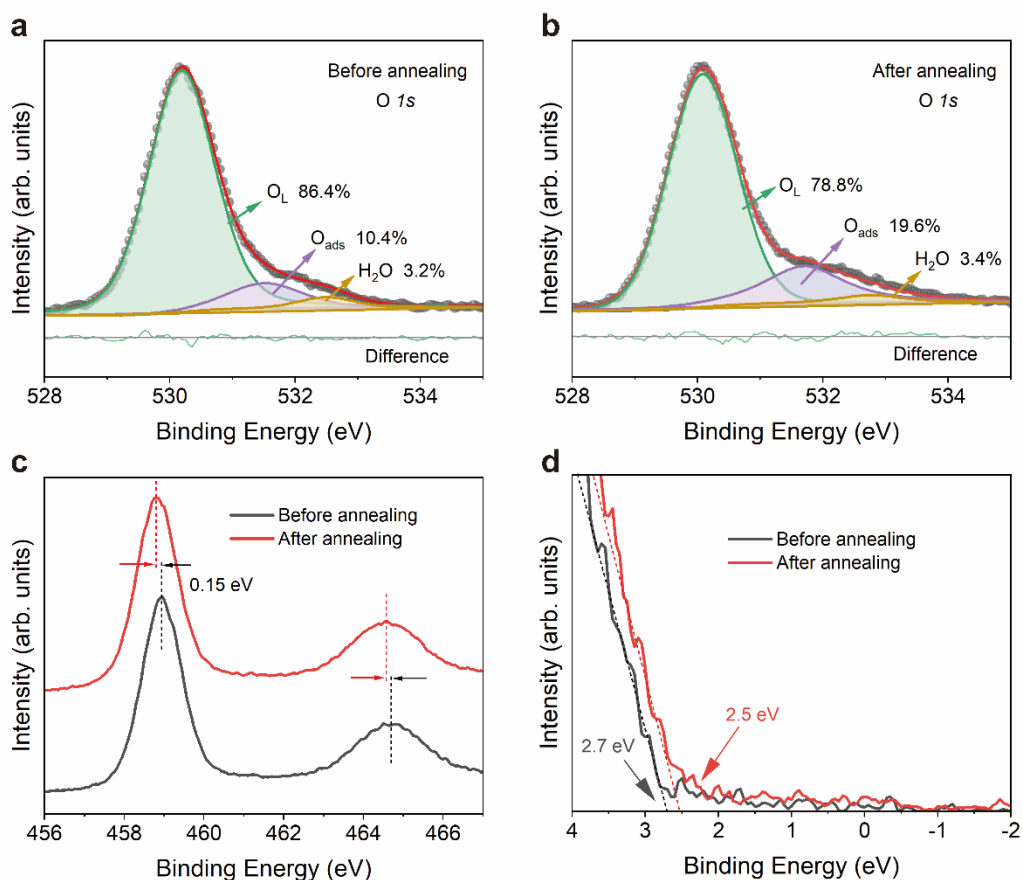

170

171 **Supplementary Fig. 9. XPS spectra of REM<sub>7μm</sub> before and after annealing in an argon**  
 172 **atmosphere. a, b** O 1s XPS spectra of REM<sub>7μm</sub> before (a) and after (b) annealing in an argon  
 173 atmosphere. c Ti 2p XPS spectra. d valence band XPS spectra. For the O 1s spectra, the peaks at  
 174 530.3, 531.5, and 532.6 eV were attributed to lattice oxygen (O<sub>L</sub>), adsorbed oxygen (O<sub>ads</sub>), and  
 175 surface oxygen (H<sub>2</sub>O), respectively<sup>17,18</sup>. The increase of the O<sub>ads</sub> demonstrates the existence of  
 176 oxygen vacancies accompanied by localized electrons richness<sup>19</sup>. The Ti 2p peak shifted to a lower  
 177 binding energy by -0.15 eV, indicating the lattice Ti<sup>4+</sup> atoms were partly reduced to Ti<sup>3+</sup>. Consistent  
 178 with the deconvolution of the O 1s XPS band, the unsaturated Ti<sup>3+</sup> further suggested the existence  
 179 of oxygen vacancies<sup>20</sup>. The position of the valence band edge shifted from 2.70 eV to 2.50 eV,  
 180 showing a narrowed band gap after the thermal treatment<sup>21</sup>.

181

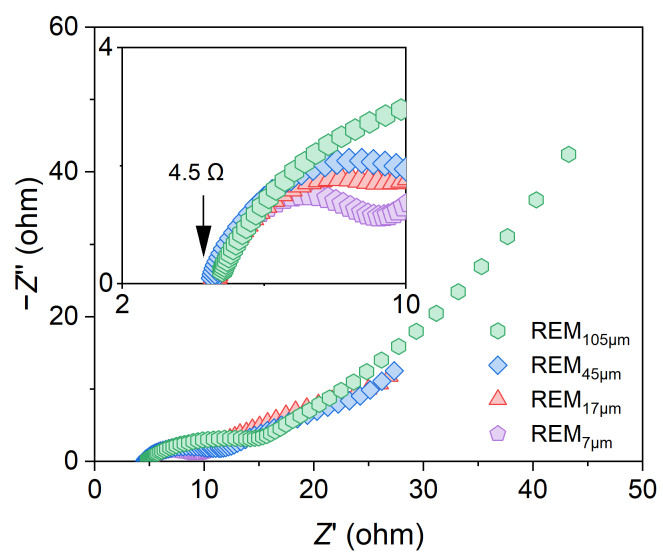

182

183 **Supplementary Fig. 10. Nyquist plots of REMs.** The data was obtained at  $0.61 V_{RHE}$  in  $0.33 M$   
184  $NaClO_4$  ( $pH = 7$ ).

185

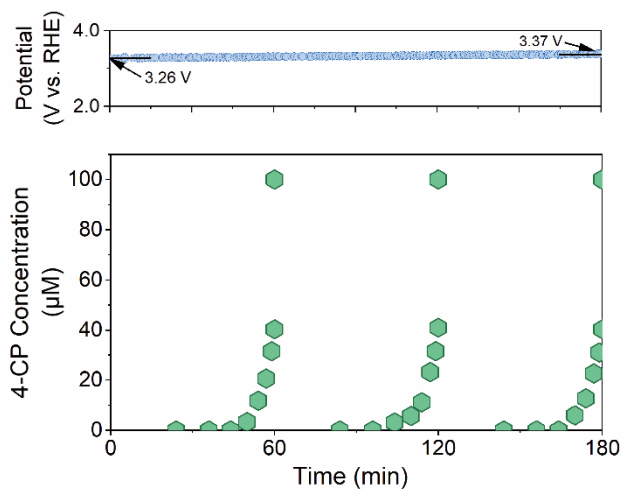

186

187 **Supplementary Fig. 11. Potential-time curve and 4-CP degradation performance of REM<sub>7μm</sub>.**  
 188 Current density: 19.7 mA cm<sup>-2</sup>. Electrolyte: 0.33 M NaClO<sub>4</sub>. All prepared electrodes were  
 189 subjected to pre-electrolysis for 3 hours. Subsequently, all experiments on each electrode were  
 190 performed within 180 minutes after the pre-electrolysis.  
 191



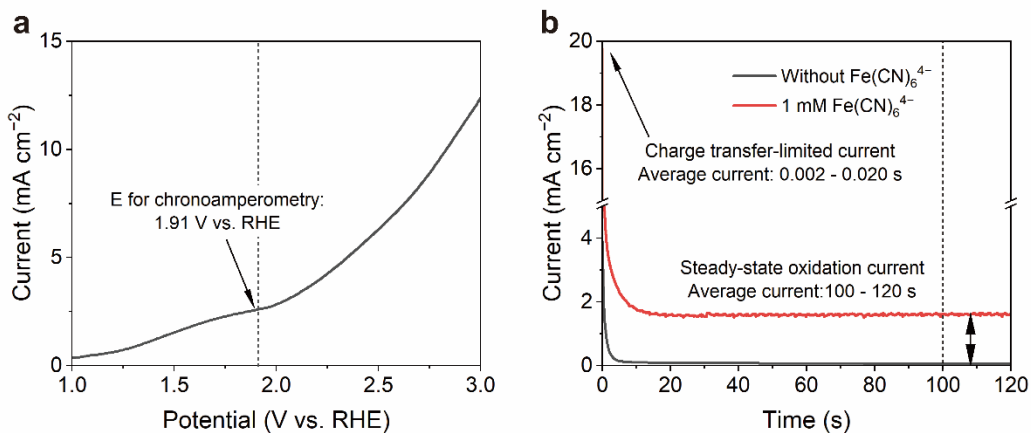

192

193 **Supplementary Fig. 12. Determination of oxidation current and charge transfer-limited**  
 194 **current.** **a** Representative linear sweep voltammetry (LSV) curve of REM<sub>105μm</sub> for Fe(CN)<sub>6</sub><sup>4-</sup>  
 195 oxidation. **b** Representative chronoamperometry curves to derive the charge transfer-limited  
 196 current and steady-state oxidation current of Fe(CN)<sub>6</sub><sup>4-22</sup>. LSV measurements were conducted at a  
 197 membrane flux of  $0.11 \times 10^{-2} \text{ m s}^{-1}$  in an electrolyte containing 1 mM Fe(CN)<sub>6</sub><sup>4-</sup>, 2 mM Fe(CN)<sub>6</sub><sup>3-</sup>,  
 198 and 0.33 M NaClO<sub>4</sub>, which was briefly denoted as 1 mM Fe(CN)<sub>6</sub><sup>4-</sup>. A potential of 1.91 V<sub>RHE</sub> was  
 199 selected to avoid the side reactions (i.e., oxidation of water molecules). The average oxidation  
 200 current at the initial phase (0.002 – 0.020 s) was calculated as the charge-transfer limited  
 201 current. Meanwhile, the current at a steady state (100 – 120 s) was employed as the mass-transfer  
 202 limited current.

203

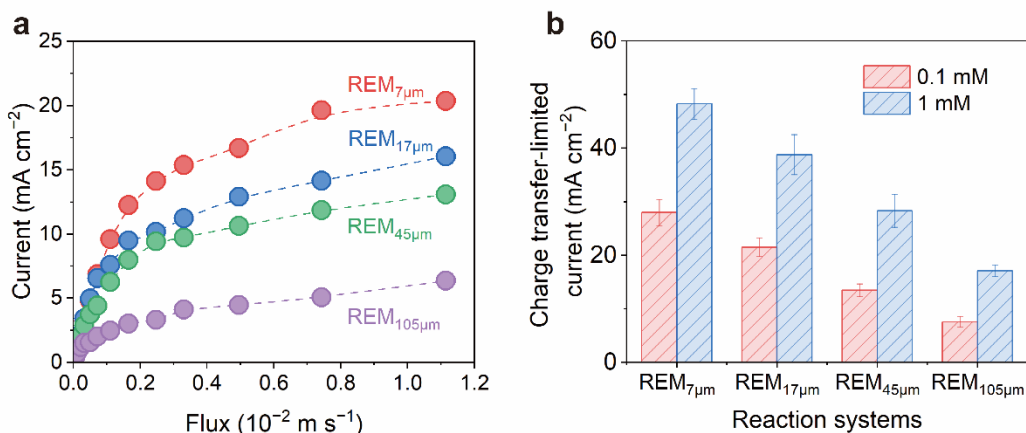

204

205 **Supplementary Fig. 13. Oxidation current and charge transfer-limited current of  $\text{Fe}(\text{CN})_6^{4-}$**   
 206 **on REMs. a** Steady-state (mass transfer-limited) oxidation current of  $\text{Fe}(\text{CN})_6^{4-}$  on REMs at  
 207 different fluxes. **b** Charge transfer-limited current on REMs at different concentrations of  
 208  $\text{Fe}(\text{CN})_6^{4-}$ . Error bars represent the standard deviations from the data obtained in 0.002 – 0.020 s.  
 209 The experiments in panel a were conducted at 1.91 V<sub>RHE</sub> electrode potential in an electrolyte  
 210 containing 1 mM  $\text{Fe}(\text{CN})_6^{4-}$ , 2 mM  $\text{Fe}(\text{CN})_6^{3-}$ , and 0.33 M  $\text{NaClO}_4$  (denoted as 1 mM in panel b).  
 211 The charge transfer-limited currents were also collected in an electrolyte containing 0.1 mM  
 212  $\text{Fe}(\text{CN})_6^{4-}$ , 0.2 mM  $\text{Fe}(\text{CN})_6^{3-}$ , and 0.33 M  $\text{NaClO}_4$  (denoted as 0.1 mM in panel b). The charge-  
 213 transfer limited current was determined according to Supplementary Fig. 12b. The charge-transfer  
 214 limited current was not linearly related to the electroactive area of REMs when 1 mM  $\text{Fe}(\text{CN})_6^{4-}$   
 215 was used. This can be attributed to the electrical resistance (Supplementary Fig. 10), and  
 216 nonuniform potential distribution (Fig. 4b) in the experimental system, which affects the charge  
 217 transfer in REMs. In the presence of 1 mM  $\text{Fe}(\text{CN})_6^{4-}$ , the steady-state oxidation currents on REMs  
 218 at relatively high flux are comparable to the corresponding charge transfer-limited currents. For  
 219 instance, the oxidation current on REM<sub>7 $\mu\text{m}$</sub>  reached 20.4 mA cm<sup>-2</sup> at a flux of  $1.1 \times 10^{-2} \text{ m s}^{-1}$ ,  
 220 which is comparable to the charge transfer limit (48.3 mA cm<sup>-2</sup>). Under such a condition, the  
 221 oxidation of  $\text{Fe}(\text{CN})_6^{4-}$  is controlled by both the charge transfer limitation and mass transport.  
 222 Meanwhile, the oxidation currents on REMs in 0.1 mM  $\text{Fe}(\text{CN})_6^{4-}$  are much smaller than the  
 223 respective charge transfer-limited currents, as shown in Supplementary Fig. 13b and Fig. 2a in the  
 224 main text. Therefore, an electrolyte with 0.1 mM  $\text{Fe}(\text{CN})_6^{4-}$  was used to further analyze the mass  
 225 transport mechanism in micropores.

226

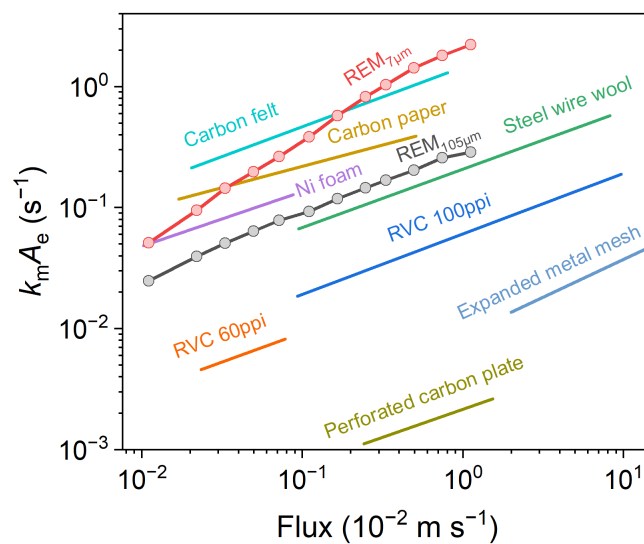

227

228 **Supplementary Fig. 14. Relationship between  $k_m A_e$  and flux for various REMs<sup>23</sup>.** The  
 229 performance of mass transfer on REM<sub>105µm</sub> is superior to reticulated vitreous carbon (RVC) and  
 230 expanded metal mesh. Further reducing the pore size to 7 µm resulted in improved mass transfer  
 231 capability that is higher than the carbon fiber materials.

232

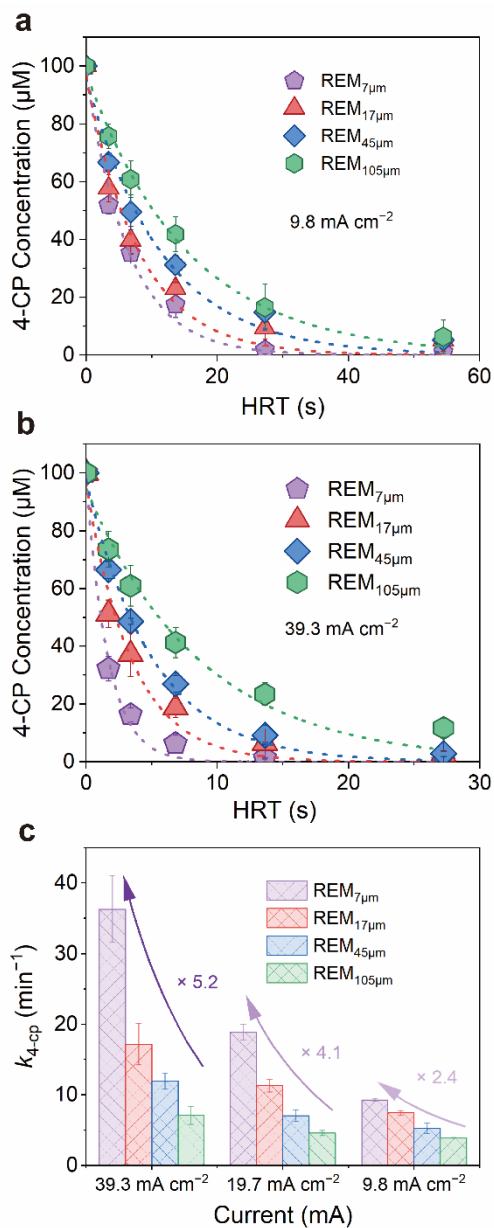

233

234 **Supplementary Fig. 15. The 4-CP degradation performance on REMs at current densities of**  
 235 **9.8  $\text{mA cm}^{-2}$  and 39.3  $\text{mA cm}^{-2}$ .** **a** The effluent 4-CP concentration as a function of HRT at a  
 236 current density of 9.8  $\text{mA cm}^{-2}$ . **b** The effluent 4-CP concentration as a function of HRT at a  
 237 current density of 39.3  $\text{mA cm}^{-2}$ . **c** The comparison of pseudo-first-order kinetic constants  
 238 on REMs at different current densities. Error bars represent the data from duplicate tests.  
 239

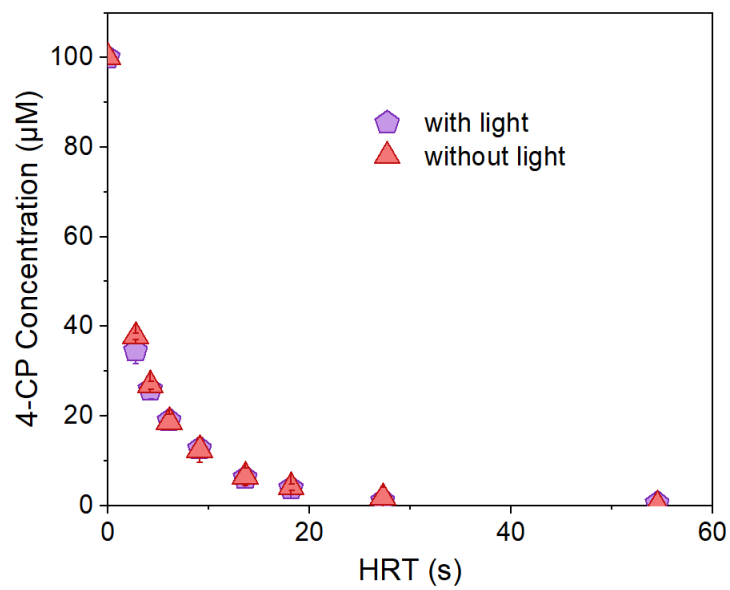

240

241 **Supplementary Fig. 16. Degradation performance of 4-CP on REM<sub>7µm</sub> under room light and**  
242 **dark conditions.** Current: 19.7 mA cm<sup>-2</sup>. Reaction area: 2.54 cm<sup>2</sup>. pH = 7. Error bars represent the  
243 data from duplicate tests.

244

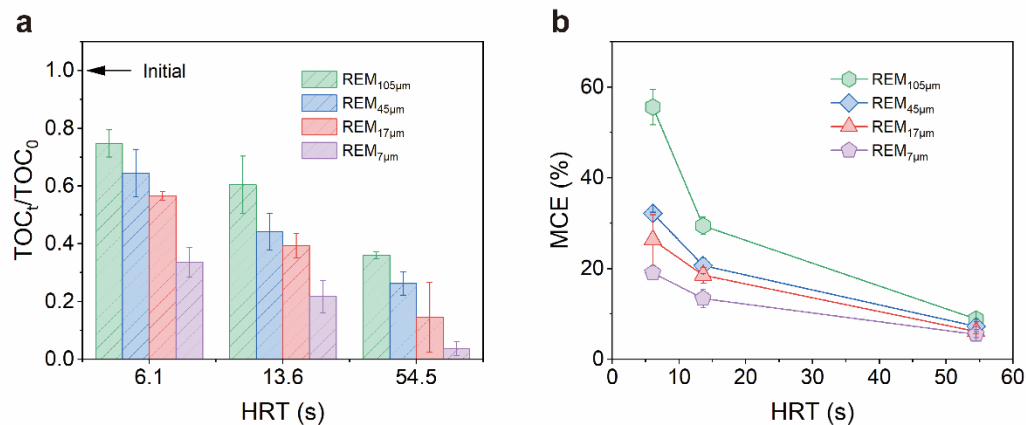

245

246

**Supplementary Fig. 17. TOC removal performance and corresponding MCE values on REMs**

247

**at different HRTs. a** The TOC removal performance on REMs at different HRTs. **b** The

248

corresponding MCE. MCE is calculated assuming that 4-CP is mineralization to CO<sub>2</sub> and H<sub>2</sub>O.

249

Error bars represent the data from duplicate tests.

250

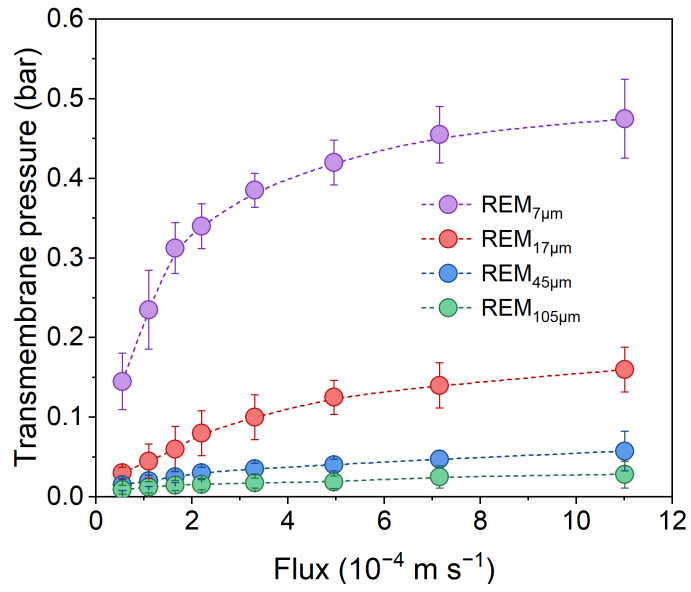

251

252 **Supplementary Fig. 18. Transmembrane pressure as a function of flux.**

253

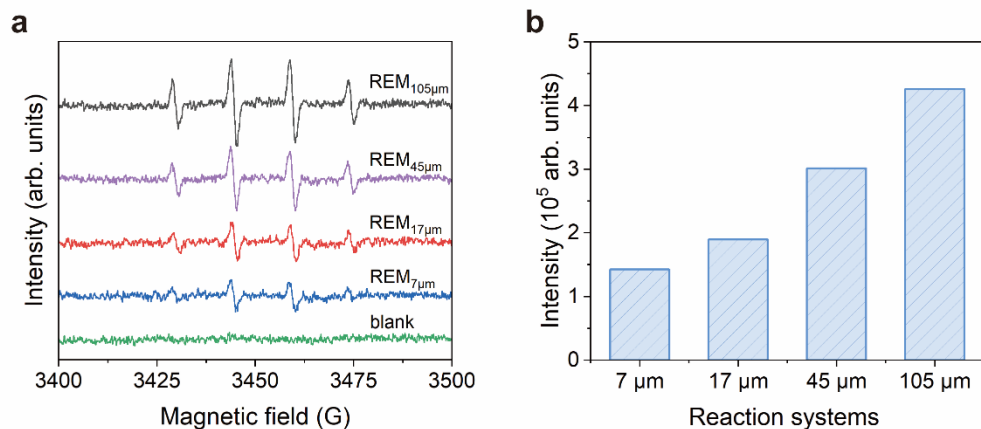

254

255 **Supplementary Fig. 19. DMPO spin trapping ESR spectra of REMs.** **a** The ESR spectra of the  
 256 REMs. **b** Peak intensity for DMPO-•OH on the REMs. The experiments were performed in the  
 257 same conditions as the degradation experiment, except that 4-CP was absent in the electrolyte. The  
 258 quartet-signal with the intensity of 1:2:2:1 can be attributed to DMPO-•OH<sup>24</sup>. The experiments  
 259 were performed at an HRT of 2.7 s.

260



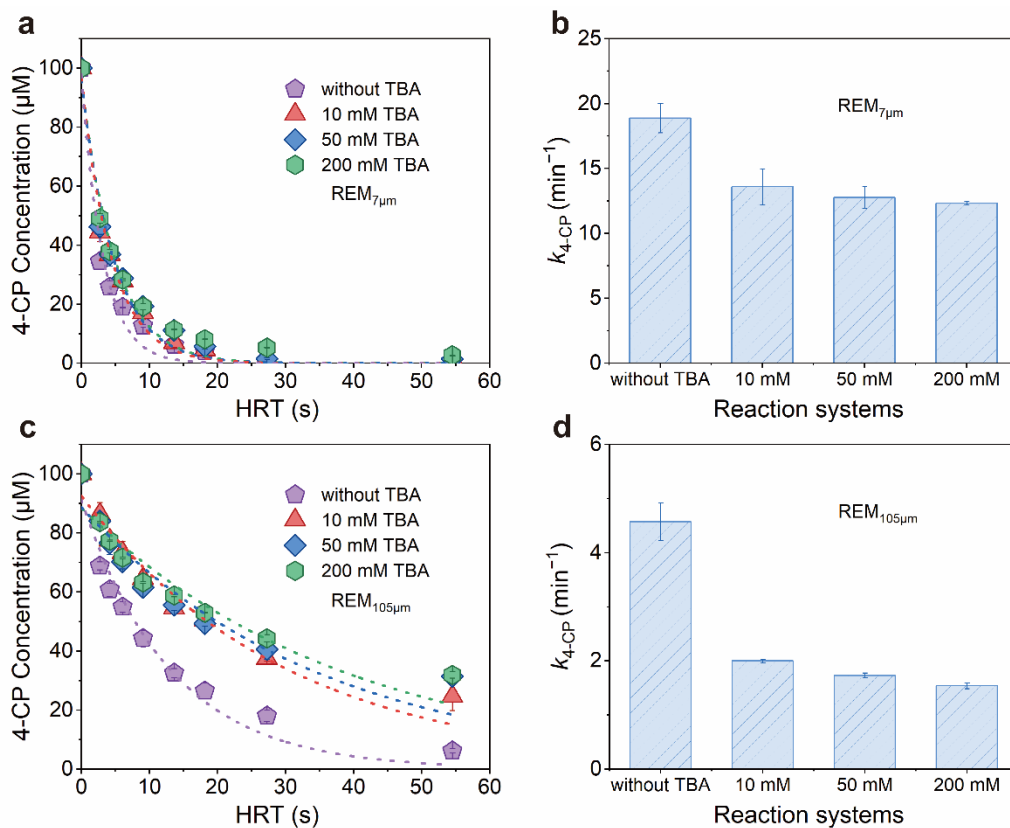

261

262 **Supplementary Fig. 20. The effluent 4-CP concentration as a function of HRT at different**  
 263 **TBA concentrations. a** The effluent 4-CP concentration as a function of HRT on REM<sub>7 $\mu\text{m}$</sub> . **b** The  
 264 corresponding pseudo-first-order kinetic constants on REM<sub>7 $\mu\text{m}$</sub> . **c** The effluent 4-CP concentration  
 265 as a function of HRT on REM<sub>105 $\mu\text{m}$</sub> . **d** The corresponding pseudo-first-order kinetic constants. The  
 266 dashed lines represent the fitted degradation curves. The initial concentration of organics: 100  $\mu\text{M}$ .  
 267 Current: 19.7  $\text{mA cm}^{-2}$ . Error bars represent the data from duplicate tests.  
 268

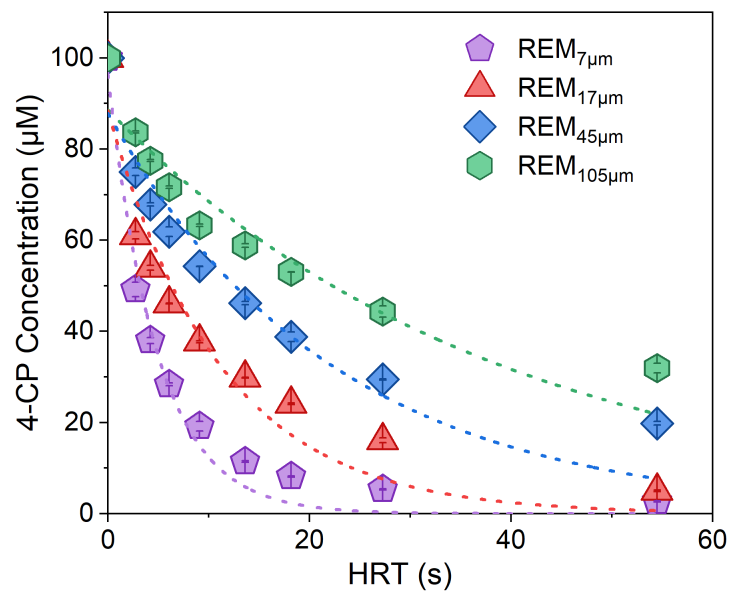

269

270 **Supplementary Fig. 21. The effluent 4-CP concentration as a function of HRT in different**  
 271 **REMs in the presence of TBA.** The dashed lines represent the fitted degradation curves. The  
 272 initial concentration of organics: 100 µM. TBA concentration: 200 mM. Current: 19.7 mA cm<sup>-2</sup>.  
 273 Error bars represent the data from duplicate tests.

274

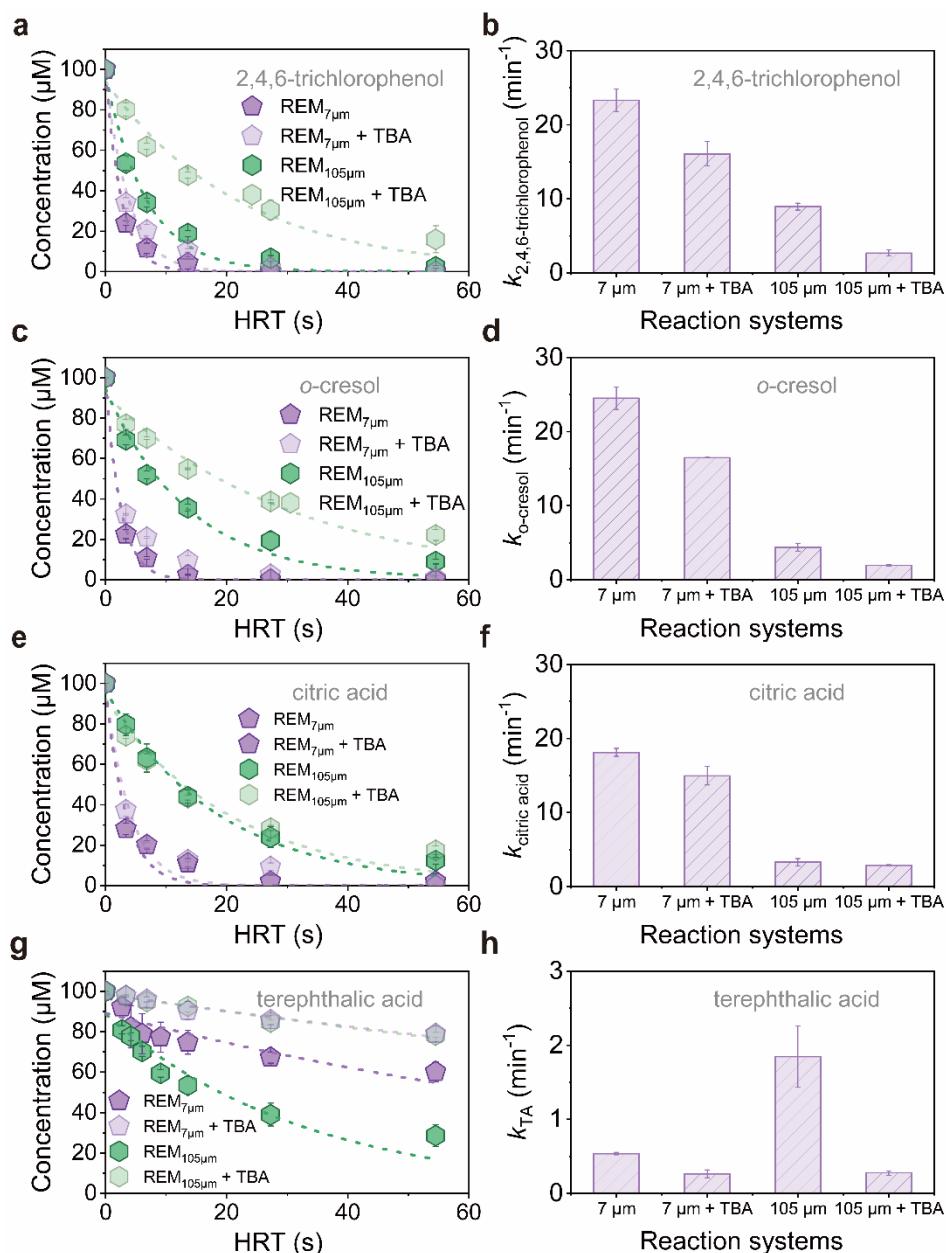

275

276 **Supplementary Fig. 22. Performance for electrochemical oxidation of organics on REMs. a**

277 The effluent 2,4,6-trichlorophenol concentration as a function of HRT. **b** The pseudo-first-order

278 kinetic constants of 2,4,6-trichlorophenol degradation. **c** The effluent *o*-cresol concentration as a

279 function of HRT. **d** The pseudo-first-order kinetic constants of *o*-cresol degradation. **e** The effluent

280 citric acid concentration as a function of HRT. **f** The pseudo-first-order kinetic constants of citric

281 acid degradation. **g** The effluent TA concentration as a function of HRT. **h** The pseudo-first-order

282 kinetic constants of TA degradation. The dashed lines represent the fitted degradation curves. The

283 initial concentration of organics: 100 μM. Current: 19.7 mA cm<sup>-2</sup>. Error bars represent the data

284 from duplicate tests.

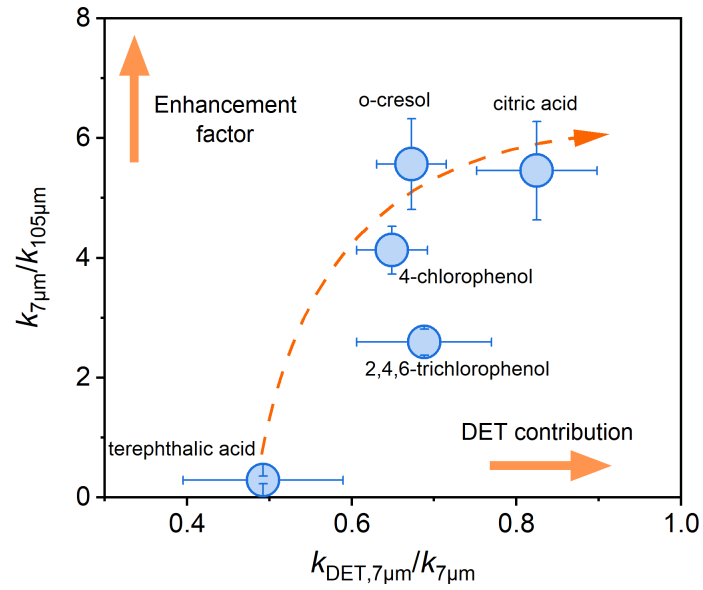

285

286 **Supplementary Fig. 23. Relationship between enhancement factors and the DET contribution**  
 287 **in  $REM_{7\mu m}$  of different model reactants.** Error bars represent the data from duplicate tests.

288

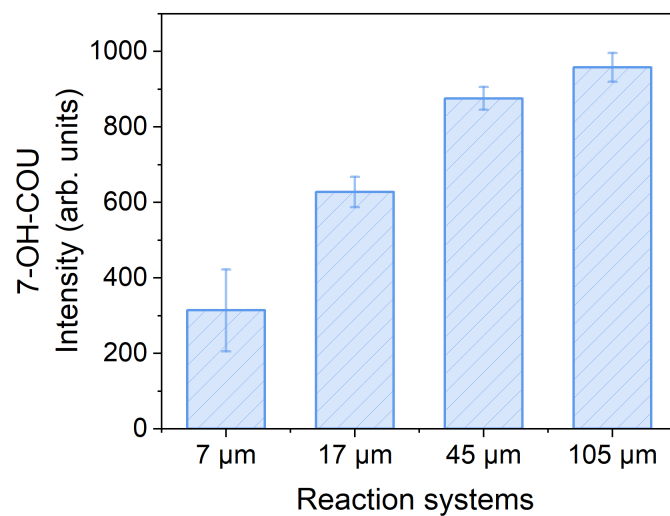

289

290 **Supplementary Fig. 24. The production of 7-OH COU.** The initial concentration of organics:  
291 100 μM. Current: 19.7 mA cm<sup>-2</sup>. HRT: 2.7 s. Error bars represent the data from duplicate tests.  
292

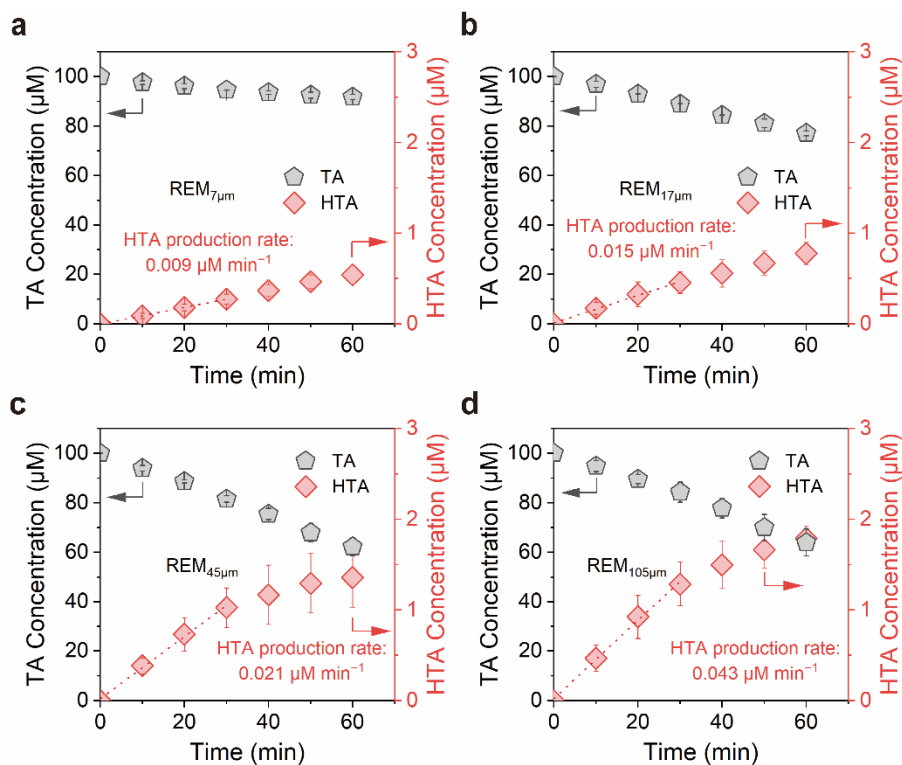

293

294 **Supplementary Fig. 25. The production of  $\bullet\text{OH}$  in a recirculation mode. a-d** The decay of TA  
 295 and production of HTA in the recirculation mode on (a)  $\text{REM}_{7\mu\text{m}}$ , (b)  $\text{REM}_{17\mu\text{m}}$ , (c)  $\text{REM}_{45\mu\text{m}}$ , and  
 296 (d)  $\text{REM}_{105\mu\text{m}}$ . The initial concentration of TA:  $100\ \mu\text{M}$ . Current:  $19.7\ \text{mA cm}^{-2}$ . Volume of water  
 297 sample:  $300\ \text{mL}$ . Electrolyte:  $0.33\ \text{M NaClO}_4$ . Flux:  $0.066\ \text{mL cm}^{-2}\ \text{s}^{-1}$ . The dotted line represents  
 298 the linear regression curve obtained from the data in the initial 30 min. Error bars represent the data  
 299 from duplicate tests.

300

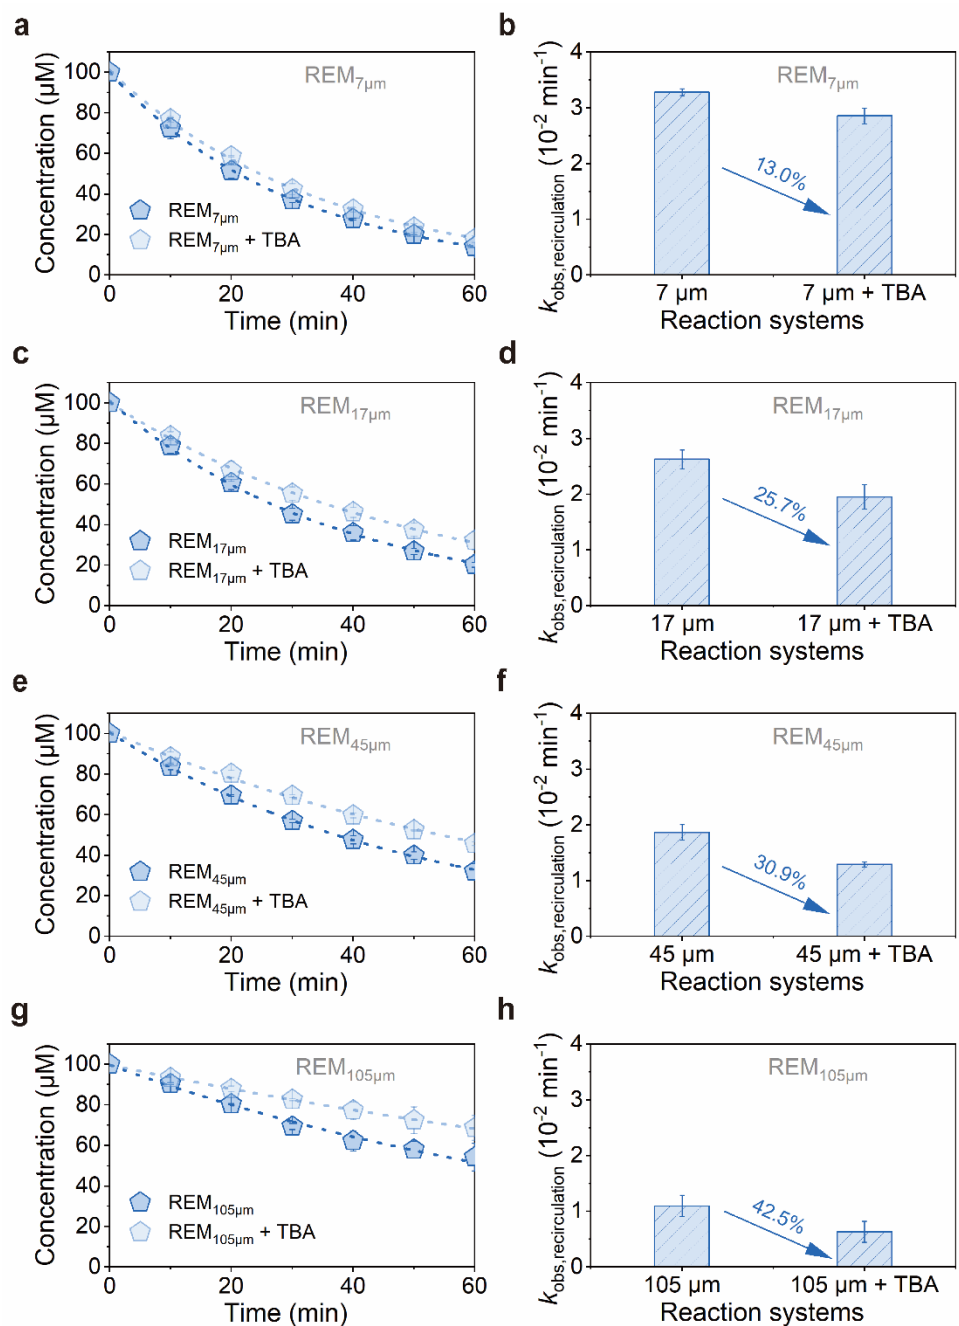

301  
 302 **Supplementary Fig. 26. The degradation performance of 4-CP in the recirculation mode. a, c,**  
 303 **e, g** The effluent 4-CP concentration as a function of HRT on (a) REM<sub>7µm</sub>, (c) REM<sub>17µm</sub>, (e)  
 304 REM<sub>45µm</sub>, and (g) REM<sub>105µm</sub>. **b, d, f, h** The corresponding pseudo-first-order kinetic constants on  
 305 (b) REM<sub>7µm</sub>, (d) REM<sub>17µm</sub>, (f) REM<sub>45µm</sub>, and (h) REM<sub>105µm</sub>. The initial concentration of 4-CP: 100  
 306 µM. Current: 19.7 mA cm<sup>-2</sup>. Volume of water sample: 300 mL. Flux: 0.066 mL cm<sup>-2</sup> s<sup>-1</sup>. Error bars  
 307 represent the data from duplicate tests.

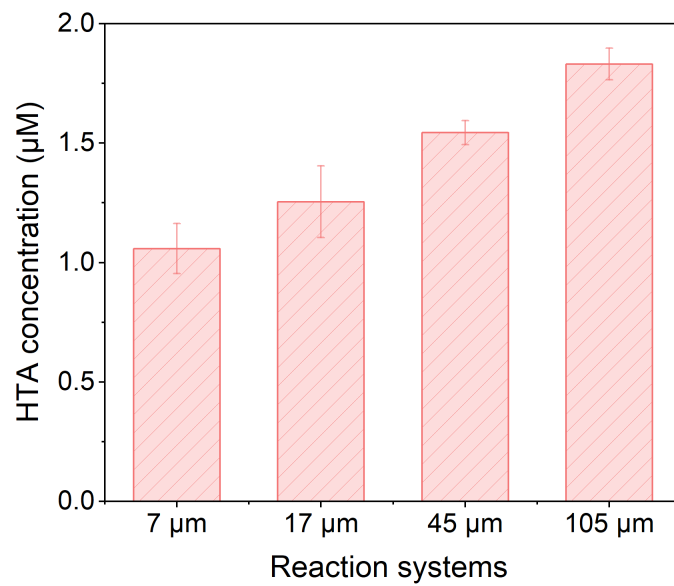

308

309 **Supplementary Fig. 27. Production of HTA on REMs.** HRT: 2.7 s. Potential: 3.8 V<sub>RHE</sub>. Error  
310 bars represent the data from duplicate tests.

311



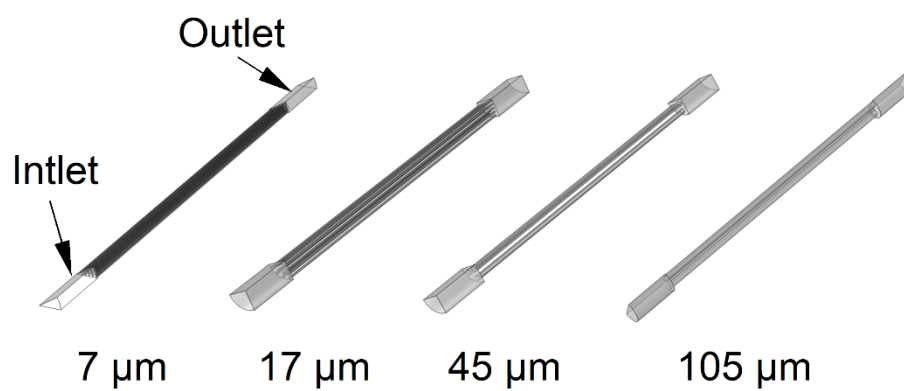

312

313 **Supplementary Fig. 28. The 3D geometry models of simulated channels.** The domain of models  
314 has been simplified according to symmetry.

315

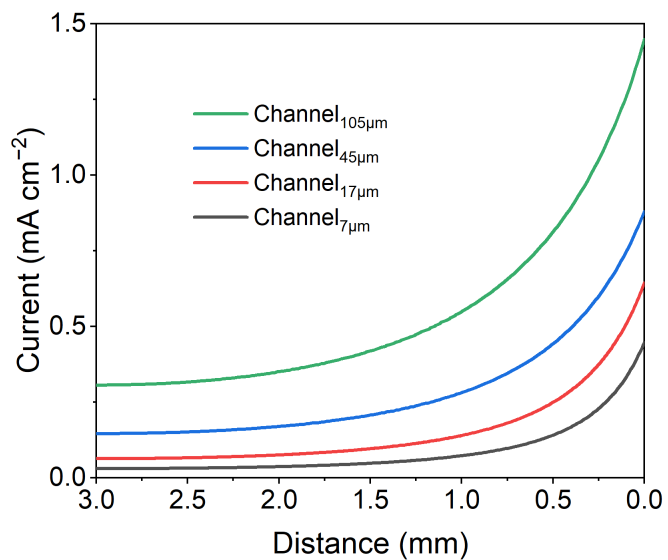

316

317 **Supplementary Fig. 29. The current distribution of simulated channels along with the**  
318 **distance to the near end.**

319

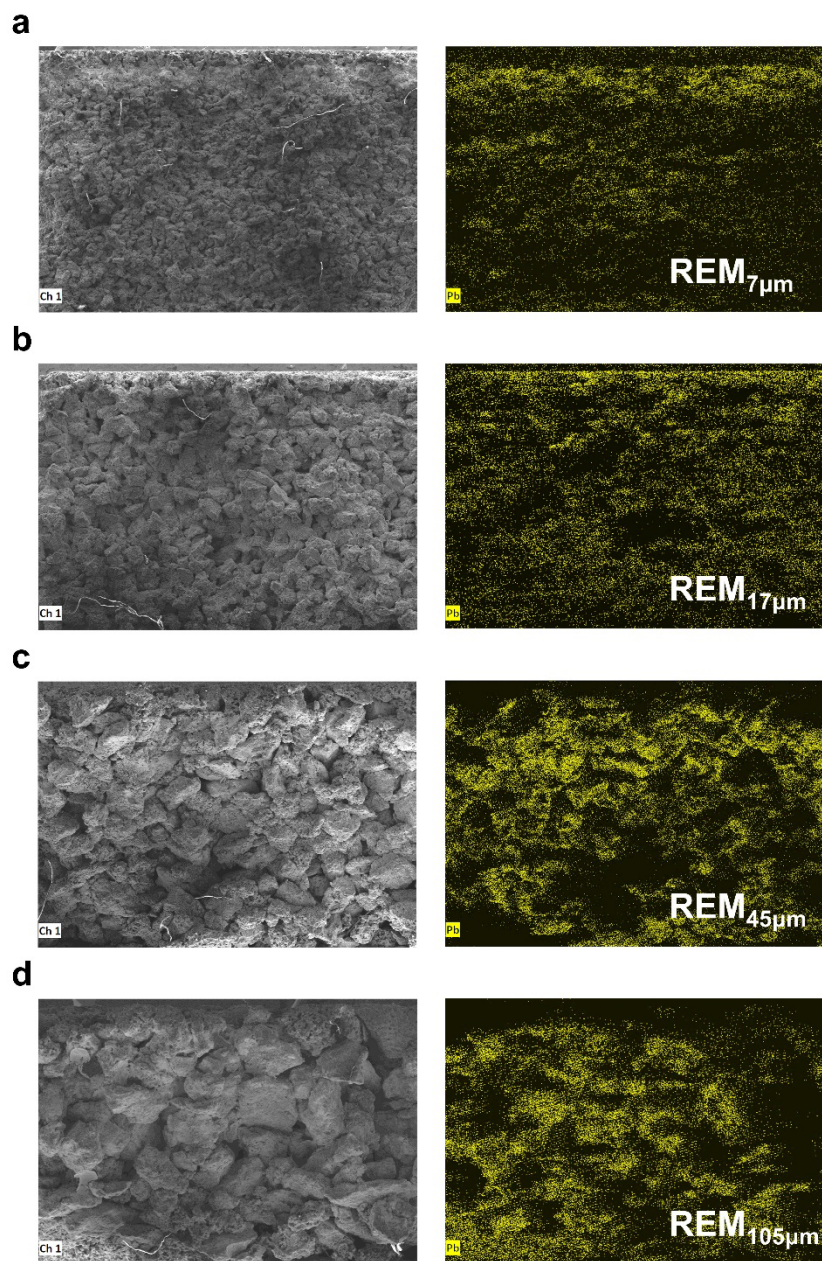

320

321 **Supplementary Fig. 30. Visualization of the potential distribution in REMs.** a-d The cross-  
 322 sectional SEM image, and Pb elemental mapping on (a) REM<sub>7μm</sub>, (b) REM<sub>17μm</sub>, (c) REM<sub>45μm</sub>, and  
 323 (d) REM<sub>105μm</sub>. Scale bars: 800 μm. Current: 19.7 mA cm<sup>-2</sup>. Reaction time: 60 min. Electrolyte: 0.05  
 324 M Pb(NO<sub>3</sub>)<sub>2</sub>, 0.33 M NaClO<sub>4</sub>.

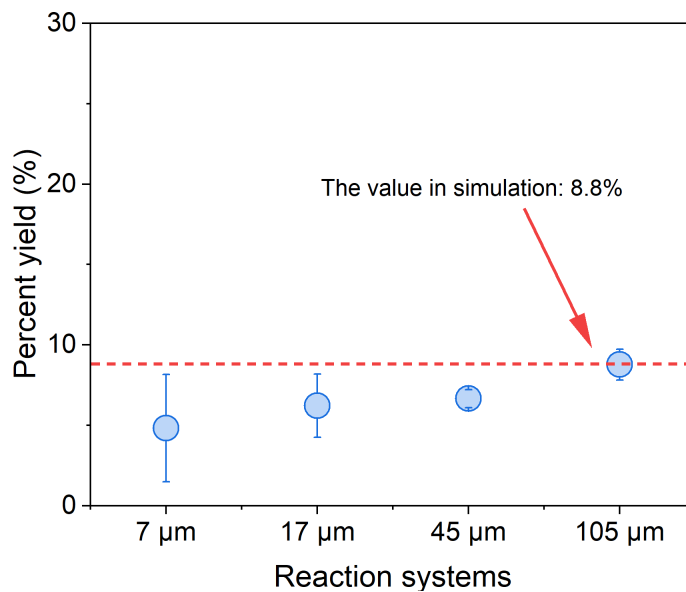

325

326 **Supplementary Fig. 31. The percent yield of HTA in the experiment.** The percent yield is the  
 327 ratio of HTA production to TA consumption. The initial concentration of TA: 100 μM. Current:  
 328 19.7 mA cm<sup>-2</sup>. HRT: 2.7 s. The percentage yields of HTA obtained on different REMs are slightly  
 329 different, where the largest pore exhibited the largest yield. This may be attributed to the fact that  
 330 the oxidation of TA via DET route cannot be neglected, where no HTA is produced in this process<sup>8</sup>.  
 331 This leads to an underestimation on the percent yield of HTA, especially on REM<sub>7μm</sub>. Therefore,  
 332 the percentage yield derived from REM<sub>105μm</sub> (8.8%) was used in the simulation, which is least  
 333 affected by DET oxidation. Error bars represent the data from duplicate tests.

334

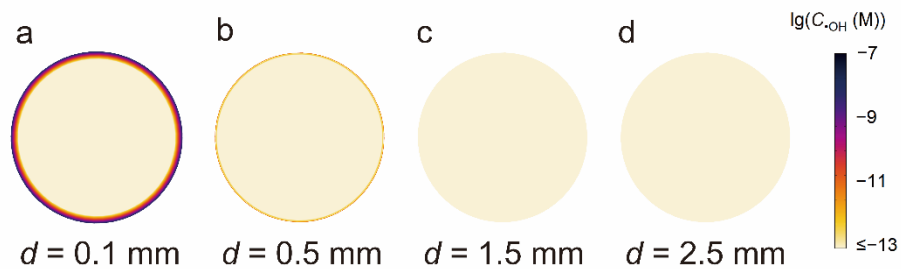

335

336 **Supplementary Fig. 32. Visualized •OH distribution in the cross-section of channel<sub>7μm</sub>. a**  $d =$   
 337  $0.1$  mm; **b**  $d = 0.5$  mm; **c**  $d = 1.5$  mm; **d**  $d = 2.5$  mm. The thin layer of •OH near the channel surface  
 338 in panel b was attributed to the diffusion of •OH. HRT: 9.1 s.

339

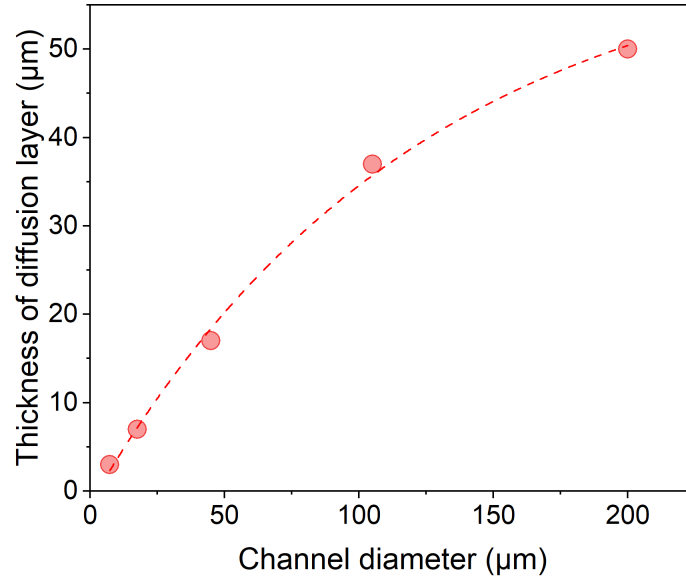

340

341 **Supplementary Fig. 33. Effect of channel diameter on the thickness of the diffusion layer in**  
342 **the cross-section ( $d = 0.1$  mm).** The thickness of the diffusion layer of channel<sub>200μm</sub> was simulated  
343 with the same porosity of channel<sub>105μm</sub>. HRT: 9.1 s.

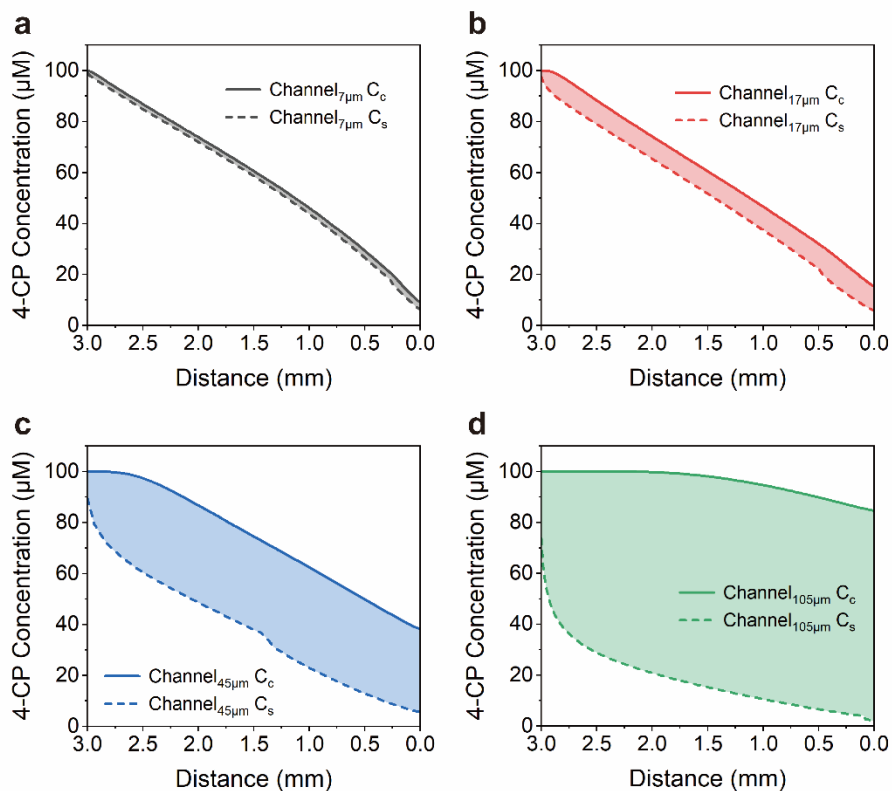

344

345 **Supplementary Fig. 34. The 4-CP concentration profile.** a-d The 4-CP concentration along the  
 346 flow direction in (a) Channel<sub>7μm</sub>, (b) Channel<sub>17μm</sub>, (c) Channel<sub>45μm</sub>, and (d) Channel<sub>105μm</sub>. C<sub>c</sub>  
 347 represents 4-CP concentration at the center of the channel. C<sub>s</sub> represents 4-CP concentration near  
 348 the surface of the channel. HRT: 9.1 s.

349

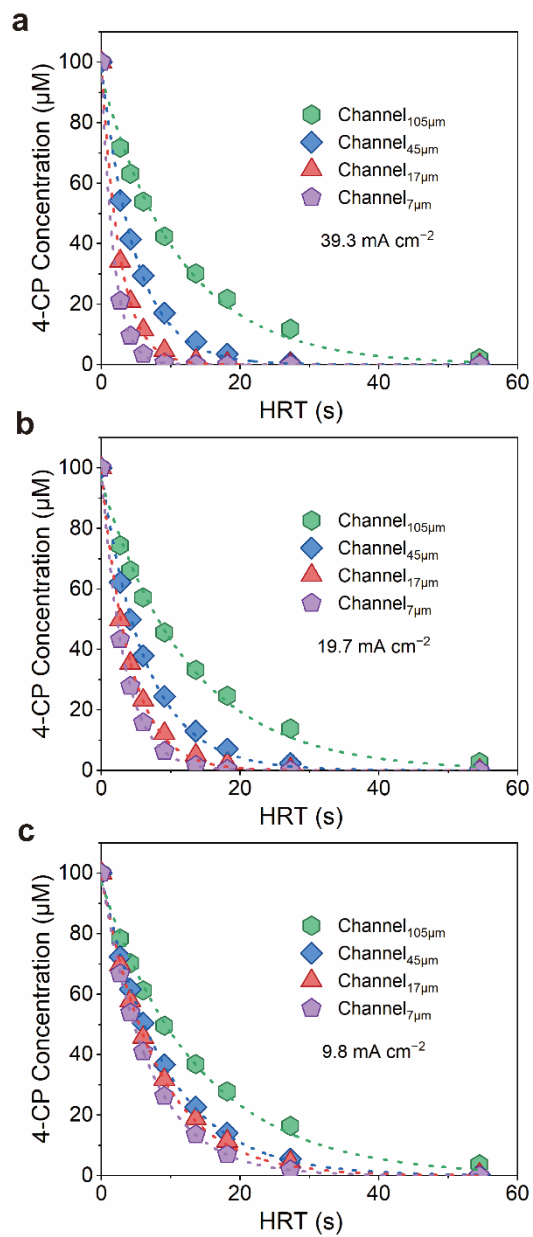

350

351 **Supplementary Fig. 35. Effluent 4-CP concentration as a function of HRT in different**  
 352 **simulated channels. a-c** The effluent 4-CP concentration as a function of HRT at current densities  
 353 of (a) 39.3 mA cm<sup>-2</sup>, (b) 19.7 mA cm<sup>-2</sup>, and (c) 9.8 mA cm<sup>-2</sup>, respectively. The dashed lines  
 354 represent the fitted degradation curves.

355



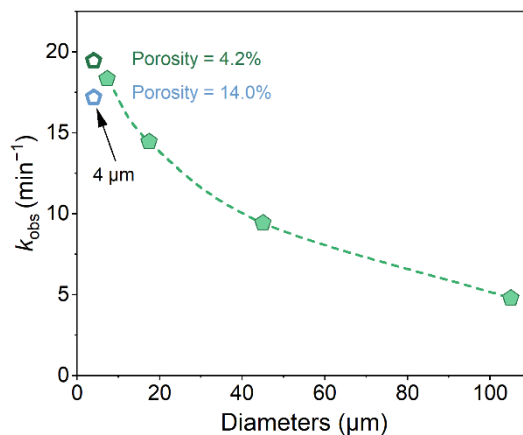

356

357 **Supplementary Fig. 36. Simulated pseudo-first-order kinetic constants of 4-CP degradation.**

358 The simulation of the channel<sub>4μm</sub> was performed with 30% (4.2%) and 100% (14%) of the porosity  
 359 of the REM<sub>7μm</sub>. The electrooxidation performance did not improve when the channel diameter  
 360 further decreased to 4 μm, due to the fully alleviated concentration polarization. Nonuniform  
 361 surface potential distribution and the less reactive area also contribute to the slightly lower  
 362 performance versus channel<sub>7μm</sub>. Interestingly, reducing the porosity of the model could evidently  
 363 increase the reaction kinetics. Although the surface area decreases at relatively low porosity, the  
 364 surface potential increases, thereby allowing more •OH to be generated.

365

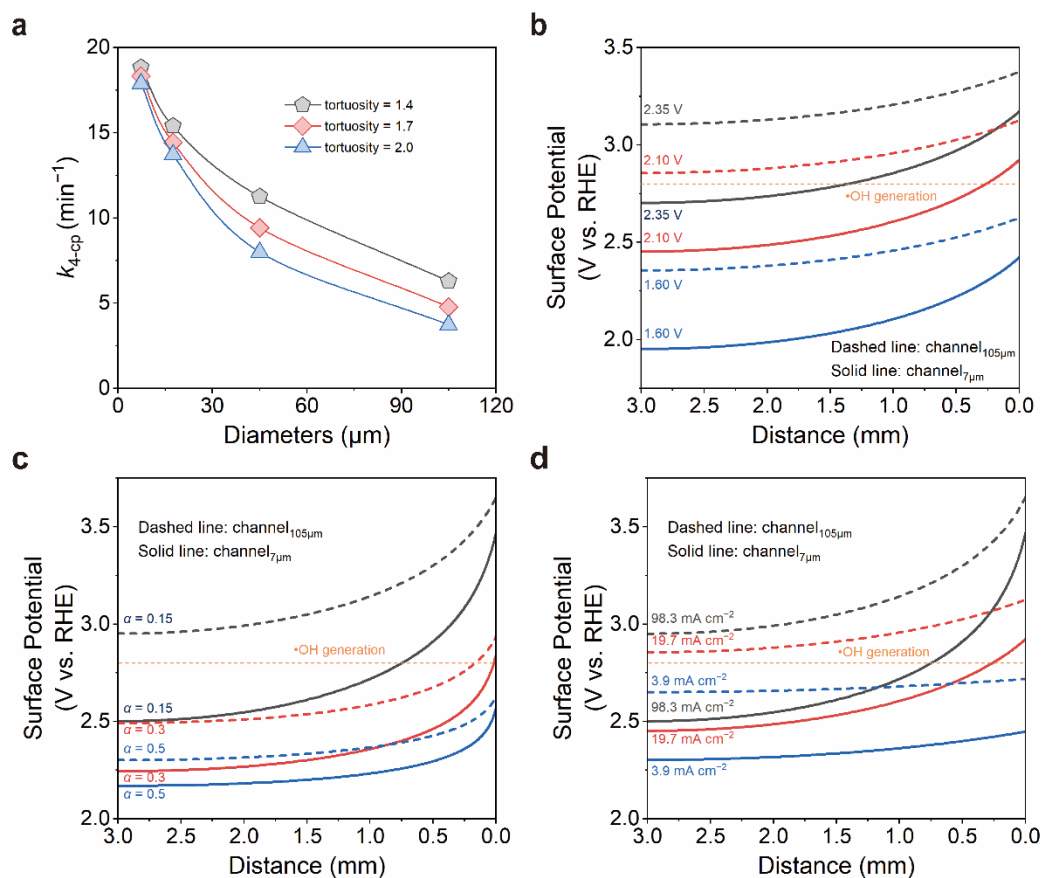

366  
 367 **Supplementary Fig. 37. Simulation of the reaction kinetics and potential distribution in the**  
 368 **channels. a** Simulated reaction kinetics at different tortuosity values. **b** Simulated surface potential  
 369 distribution in channel<sub>105 $\mu\text{m}$</sub>  and channel<sub>7 $\mu\text{m}$</sub>  at different onset potentials ( $E_o$ ). **c** Simulated surface  
 370 potential distribution in channel<sub>105 $\mu\text{m}$</sub>  and channel<sub>7 $\mu\text{m}$</sub>  at different transfer coefficients ( $\alpha$ ). **d**  
 371 Simulated surface potential distribution in channel<sub>105 $\mu\text{m}$</sub>  and channel<sub>7 $\mu\text{m}$</sub>  at different applied currents.  
 372 Due to the slow mass transfer in large channels, the reaction kinetics are greatly affected by  
 373 tortuosity. The region with •OH-producing activity expands with the increase of  $E_o$ . A higher  
 374 applied current and a larger  $\alpha$  lead to a more nonuniform potential distribution. The simulated  
 375 results follow a similar trend to other studies<sup>25,26</sup>.

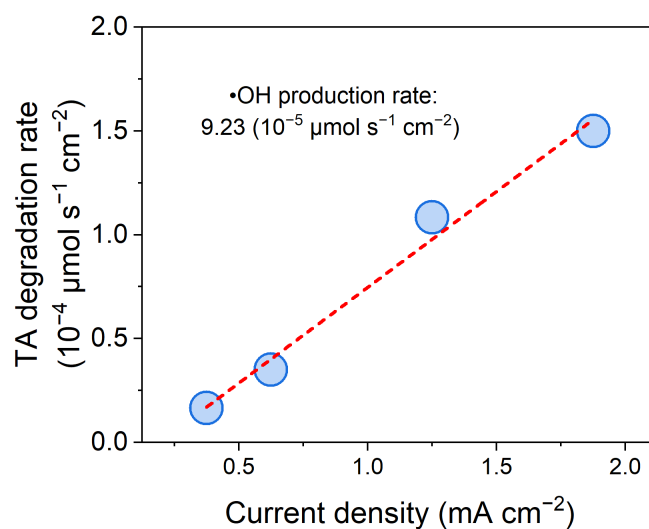

376

377 **Supplementary Fig. 38. TA degradation rate and •OH production rate on a defective TiO<sub>2</sub>**  
 378 **plate electrode.** Electrolyte: 0.5 mM TA and 0.33 M NaClO<sub>4</sub>. The dashed line represents the fitted  
 379 curve. A defective TiO<sub>2</sub> plate with an area of 8 cm<sup>2</sup> was used as the anode and a Pt wire as the  
 380 counter electrode. Considering that TA is relatively resistant to DET reaction<sup>8</sup>, the reaction with  
 381 •OH is the dominant oxidation mechanism. Therefore, the •OH production was estimated according  
 382 to TA degradation. The experiments were conducted at 30 ± 1 °C in 0.33 M NaClO<sub>4</sub> with an initial  
 383 TA concentration of 0.5 mM, which is reported to be high enough to trap all the radicals<sup>27</sup>. The  
 384 •OH production rate (i.e., the slope of the fitted curve, corresponding to  $\frac{k_{g,\bullet\text{OH}}}{F}$  in Supplementary  
 385 equation (6)) was estimated to be 9.23 × 10<sup>-5</sup> μmol cm<sup>-2</sup> s<sup>-1</sup> when the current density was 1 mA cm<sup>-2</sup>.  
 386 The value of  $k_{g,\bullet\text{OH}}$  can be therefore calculated to be 8.91 × 10<sup>-6</sup> (C cm<sup>-2</sup> s<sup>-1</sup>) and was used in the  
 387 simulation.

388

389 **Supplementary Table 1.** The surface area of REMs and corresponding microchannels.

|                      | <b>BET Area<sup>a</sup></b><br>[m <sup>2</sup> g <sup>-1</sup> ] | <b>Mercury Intrusion</b><br><b>Area<sup>a</sup></b><br>[m <sup>2</sup> g <sup>-1</sup> ] | <b>Cdl<sup>b</sup></b><br>[F cm <sup>-2</sup> ] |
|----------------------|------------------------------------------------------------------|------------------------------------------------------------------------------------------|-------------------------------------------------|
| REM <sub>7μm</sub>   | 10.85                                                            | 9.98                                                                                     | 0.41                                            |
| REM <sub>17μm</sub>  | 6.73                                                             | 6.59                                                                                     | 0.26                                            |
| REM <sub>45μm</sub>  | 5.36                                                             | 5.88                                                                                     | 0.21                                            |
| REM <sub>105μm</sub> | 2.68                                                             | 2.47                                                                                     | 0.10                                            |

390 <sup>a</sup>The Brunauer–Emmett–Teller (BET) surface area and mercury intrusion area reveal the  
391 microstructure surface area of REMs and these results show good consistency. The well-  
392 recognized BET surface area was used for the subsequent analysis in this study. <sup>b</sup>The  $C_{dl}$  value is  
393 proportional to the electrochemically active surface area. This result corresponds well with the  
394 BET surface area.  
395

396 **Supplementary Table 2.** Energy consumption for 4-CP degradation on REMs.<sup>a</sup>

|                      | <b>Cell Voltage</b><br>[V] | <b><i>k</i></b><br>[min <sup>-1</sup> ] | <b>HRT<sub>90%</sub><sup>b</sup></b><br>[s] | <b>Volume</b><br>[cm <sup>3</sup> ] | <b>Flow Rate</b><br>[10 <sup>-2</sup> mL cm <sup>-2</sup> s <sup>-1</sup> ] | <b>ΔP<sup>c</sup></b><br>[bar] | <b><i>E<sub>E</sub></i><sup>d</sup></b><br>[kWh m <sup>-3</sup> ] | <b><i>E<sub>P</sub></i><sup>e</sup></b><br>[kWh m <sup>-3</sup> ] | <b>Energy Consumption</b><br>[kWh m <sup>-3</sup> ] |
|----------------------|----------------------------|-----------------------------------------|---------------------------------------------|-------------------------------------|-----------------------------------------------------------------------------|--------------------------------|-------------------------------------------------------------------|-------------------------------------------------------------------|-----------------------------------------------------|
| REM <sub>7μm</sub>   | 4.9                        | 18.9                                    | 7.3                                         | 0.76                                | 4.09                                                                        | 0.401                          | 0.654                                                             | 0.209                                                             | 0.863                                               |
| REM <sub>17μm</sub>  | 5.1                        | 11.3                                    | 12.2                                        | 0.76                                | 2.45                                                                        | 0.081                          | 1.137                                                             | 0.042                                                             | 1.179                                               |
| REM <sub>45μm</sub>  | 5.2                        | 7.0                                     | 19.7                                        | 0.76                                | 1.52                                                                        | 0.022                          | 1.868                                                             | 0.011                                                             | 1.879                                               |
| REM <sub>105μm</sub> | 5.4                        | 4.6                                     | 30.0                                        | 0.76                                | 1.00                                                                        | 0.009                          | 2.949                                                             | 0.005                                                             | 2.954                                               |

397 <sup>a</sup>The energy consumption was calculated according to the methods described in the Supplementary  
 398 Text.

399 <sup>b</sup>HRT<sub>90%</sub> refers to the time required to reach 90% 4-CP removal.

400 <sup>c</sup>ΔP refers to the transmembrane pressure and is determined from Supplementary Fig. 18.

401 <sup>d</sup>*E<sub>E</sub>* refers to the electrical energy. <sup>e</sup>*E<sub>P</sub>* refers to the pumping energy.

402

403 **Supplementary Table 3.** The porosity of REMs determined by Archimedes' method <sup>28</sup>.

|      | <b>Average Diameters</b> | <b>Porosity</b> |
|------|--------------------------|-----------------|
|      | [ $\mu\text{m}$ ]        |                 |
| REMs | 7                        | 14%             |
|      | 17                       | 19%             |
|      | 45                       | 26%             |
|      | 105                      | 32%             |

404 REMs were dried overnight and weighed to determine the dry weight. Then, the samples were  
405 immersed and sonicated for 30 min to make water fully infiltrate into REMs. After infiltration,  
406 the wet weight was measured. Finally, the porosity was calculated using the geometric size of  
407 REMs and data collected by the Archimedes' method<sup>28</sup>.  
408

409 **Supplementary Table 4.** Parameters and values used in the simulation.

| Parameters                                                         | Value                                                                          |
|--------------------------------------------------------------------|--------------------------------------------------------------------------------|
| Oxygen evolution potential <sup>a</sup>                            | 2.1 [V]                                                                        |
| Exchange current density of oxygen evolution                       | $4 \times 10^{-2}$ [ $\text{A m}^{-2}$ ] <sup>29</sup>                         |
| Electron transferred coefficient for oxygen evolution <sup>b</sup> | 0.15                                                                           |
| Conductivity of electrolyte                                        | 2.54 [ $\text{S m}^{-1}$ ]                                                     |
| Applied current of one channel <sup>c</sup>                        | 0.059, 0.278, 1.203, 5.333 [ $\mu\text{A}$ ]                                   |
| Inlet concentration                                                | $1 \times 10^{-4}$ [M]                                                         |
| HRT for 4-CP simulation                                            | 2.7 – 54.5 [s]                                                                 |
| HRT for TA simulation                                              | 2.7 [s]                                                                        |
| $k_{g, \bullet\text{OH}}^{\text{d}}$                               | $8.91 \times 10^{-6}$                                                          |
| $k_{4\text{-CP}, \bullet\text{OH}}$                                | $7.6 \times 10^6$ [ $\text{m}^3 \text{s}^{-1} \text{mol}^{-1}$ ] <sup>30</sup> |
| $k_{\text{TA}, \bullet\text{OH}}$                                  | $4.4 \times 10^6$ [ $\text{m}^3 \text{s}^{-1} \text{mol}^{-1}$ ] <sup>31</sup> |
| $k_{4\text{-CP}, \text{DET}}^{\text{e}}$                           | 0.386 [ $\text{m}^3 \text{mol}^{-1}$ ]                                         |
| $k_{\bullet\text{OH}, \bullet\text{OH}}$                           | $5.5 \times 10^6$ [ $\text{m}^3 \text{s}^{-1} \text{mol}^{-1}$ ] <sup>32</sup> |
| $k_{4\text{-CP products}, \bullet\text{OH}}^{\text{f}}$            | $5.0 \times 10^6$ [ $\text{m}^3 \text{s}^{-1} \text{mol}^{-1}$ ]               |
| $\bullet\text{OH}$ diffusion coefficient                           | $2.2 \times 10^{-9}$ [ $\text{m}^2 \text{s}^{-1}$ ] <sup>10</sup>              |
| 4-CP diffusion coefficient                                         | $4.5 \times 10^{-10}$ [ $\text{m}^2 \text{s}^{-1}$ ] <sup>33</sup>             |
| TA diffusion coefficient <sup>g</sup>                              | $0.8 \times 10^{-9}$ [ $\text{m}^2 \text{s}^{-1}$ ]                            |
| Tortuosity ( $\tau$ ) <sup>h</sup>                                 | 1.7 <sup>i</sup>                                                               |

410 <sup>a</sup>The oxygen evolution potential was determined based on the experiment (Fig. 1c).

411 <sup>b</sup>The charge transfer coefficient ( $\alpha$ ) was determined according to other studies. Although a value of  
 412  $\alpha = 0.5$  is expected on inactive electrodes, several experimental studies have reported  $\alpha < 0.5$   
 413 for the OER reaction<sup>2,34</sup>, even as low as 0.10 for  $\text{Ti}_4\text{O}_7$ . A value of  $\alpha = 0.15$  is used in the  
 414 simulation.

415 <sup>c</sup>The applied current in representative channels was determined according to the geometric area of  
 416 electrodes (Supplementary equation (5)).

417 <sup>d</sup>The rate constant for  $\bullet\text{OH}$  production was determined based on the experiment (Supplementary  
 418 Fig. 28).

419 <sup>e</sup>The rate constant for DET reaction of 4-CP was determined based on the parameters optimization  
 420 in the simulation.

421 <sup>f</sup>The rate constant for radical oxidation of intermediate product was determined based on previous  
422 studies and parameters optimization in the simulation<sup>30</sup>.

423 <sup>g</sup>The diffusion coefficient of TA was estimated according to other organic molecules (0.67 – 0.99  
424 m<sup>2</sup> s<sup>-1</sup>)<sup>35</sup>.

425 <sup>h</sup>The diffusion coefficient was corrected as  $\frac{D}{\tau^2}$ <sup>36</sup>, because the tortuosity of the pores may inhibit the  
426 diffusion process of molecules<sup>37</sup>.

427 <sup>i</sup>The tortuosity was estimated according to a previous study (1.2 – 1.8)<sup>38</sup>.

428



429 **Supplementary References**

- 430 1 Chen, M. *et al.* Development of a highly efficient electrochemical flow-through anode  
431 based on inner in-site enhanced TiO<sub>2</sub>-nanotubes array. *Environ. Int.* **140**, 105813 (2020).
- 432 2 Khalid, Y. S., Misal, S. N., Mehraeen, S. & Chaplin, B. P. Reactive-transport modeling of  
433 electrochemical oxidation of perfluoroalkyl substances in porous flow-through electrodes.  
434 *ACS ES. T. Eng.* **2**, 713-725 (2022).
- 435 3 Chen, Z., Danilov, D. L., Eichel, R. A. & Notten, P. H. L. Porous Electrode Modeling and  
436 its Applications to Li - Ion Batteries. *Adv. Energy Mater.* **12**, 2201506 (2022).
- 437 4 Donaghue, A. & Chaplin, B. P. Effect of select organic compounds on perchlorate  
438 formation at boron-doped diamond film anodes. *Environ. Sci. Technol.* **47**, 12391-12399  
439 (2013).
- 440 5 Trainham, J. A. & j, N. A flow-through porous electrode model: Application to metal-ion  
441 removal from dilute streams. *J. Electrochem. Soc.* **124**, 1528-1540 (1977).
- 442 6 Trainham, J. A. & j, N. The effect of electrode placement and finite matrix conductivity on  
443 the performance of flow-through porous electrodes. *J. Electrochem. Soc.* **125**, 58-67  
444 (1978).
- 445 7 Bard, A. J. & Faulkner, L. R. *Electrochemical Methods: Fundamentals and Applications*.  
446 2nd edn, (Wiley, 2001).
- 447 8 Jing, Y. & Chaplin, B. P. Mechanistic study of the validity of using hydroxyl radical probes  
448 to characterize electrochemical advanced oxidation processes. *Environ. Sci. Technol.* **51**,  
449 2355-2365 (2017).
- 450 9 Yang, K. *et al.* Energy-efficient removal of trace antibiotics from low-conductivity water  
451 using a Ti<sub>4</sub>O<sub>7</sub> reactive electrochemical ceramic membrane: matrix effects and  
452 implications for byproduct formation. *Water Res.* **224**, 119047 (2022).
- 453 10 Kapałka, A., Fóti, G. & Comninellis, C. The importance of electrode material in  
454 environmental electrochemistry. *Electrochim. Acta.* **54**, 2018-2023 (2009).
- 455 11 Marshall, A. T. & Herritsch, A. Understanding how the oxygen evolution reaction kinetics  
456 influences electrochemical wastewater oxidation. *Electrochim. Acta.* **282**, 448-458 (2018).
- 457 12 Yu, N. *et al.* Electrocatalysis degradation of coal tar wastewater using a novel  
458 hydrophobic benzalacetone modified lead dioxide electrode. *Chemosphere* **289**, 133014  
459 (2022).
- 460 13 Zheng, J., Wang, Z., Ma, J., Xu, S. & Wu, Z. Development of an electrochemical ceramic  
461 membrane filtration system for efficient contaminant removal from waters. *Environ. Sci.*  
462 *Technol.* **52**, 4117-4126 (2018).
- 463 14 Sirés, I. *et al.* Electrochemical degradation of paracetamol from water by catalytic action  
464 of Fe<sup>2+</sup>, Cu<sup>2+</sup>, and UVA light on electrogenerated hydrogen peroxide. *J. Electrochem.*  
465 *Soc.* **153**, D1 (2006).

- 466 15 Zhao, G., Zhang, L., Niu, Y. & Sun, K. A molten Mg corrosion method for preparing  
467 porous Ti foam as self-supported Li–O<sub>2</sub> battery cathodes. *Electrochim. Acta.* **224**, 64-70  
468 (2017).
- 469 16 Gu, Z. *et al.* Interface-modulated nanojunction and microfluidic platform for  
470 photoelectrocatalytic chemicals upgrading. *Appl. Catal. B.* **282**, 119541 (2021).
- 471 17 Wang, L. *et al.* Blue TiO<sub>2</sub> nanotube electrocatalytic membrane electrode for efficiency  
472 electrochemical degradation of organic pollutants. *Chemosphere* **306**, 135628 (2022).
- 473 18 Yao, Y. *et al.* Phase change on stainless-steel mesh for promoting sulfate radical  
474 formation via peroxymonosulfate oxidation. *Appl. Catal. B.* **278**, 119333 (2020).
- 475 19 Lim, J., Yang, Y. & Hoffmann, M. R. Activation of Peroxymonosulfate by Oxygen  
476 Vacancies-Enriched Cobalt-Doped Black TiO(2) Nanotubes for the Removal of Organic  
477 Pollutants. *Environ. Sci. Technol.* **53**, 6972-6980 (2019).
- 478 20 Yang, S. Y., Park, J., Jeong, H. W. & Park, H. Electrocatalytic activities of  
479 electrochemically reduced tubular titania arrays loaded with cobalt ions in flow-through  
480 processes. *Chem. Eng. J.* **404**, 126410 (2021).
- 481 21 Su, T. *et al.* An insight into the role of oxygen vacancy in hydrogenated TiO<sub>2</sub> nanocrystals  
482 in the performance of dye-sensitized solar cells. *ACS Appl. Mater. Interfaces* **7**, 3754-  
483 3763 (2015).
- 484 22 Kim, M. J., Seo, Y., Cruz, M. A. & Wiley, B. J. Metal nanowire felt as a flow-through  
485 electrode for high-productivity electrochemistry. *ACS Nano.* **13**, 6998-7009 (2019).
- 486 23 Arenas, L. F., Ponce de León, C. & Walsh, F. C. 3D-printed porous electrodes for  
487 advanced electrochemical flow reactors: A Ni/stainless steel electrode and its mass  
488 transport characteristics. *Electrochem. Commun.* **77**, 133-137 (2017).
- 489 24 Chen, L. *et al.* Accurate identification of radicals by in-situ electron paramagnetic  
490 resonance in ultraviolet-based homogenous advanced oxidation processes. *Water Res.*  
491 **221**, 118747 (2022).
- 492 25 Lasia, A. Impedance of porous electrodes. *J. Electroanal. Chem.* **397**, 27-33 (1995).
- 493 26 Yang, K., Zu, D., Zhang, Z., Ma, J. & Yang, Z. Mechanistic Insight into the Spatial Scale  
494 of Nonuniform Oxidation of Micropollutants in Reactive Electrochemical Membranes for  
495 Water Purification. *ACS ES. T. Eng.* (2023).
- 496 27 Ishibashi, K.-i., Fujishima, A., Watanabe, T. & Hashimoto, K. Detection of active oxidative  
497 species in TiO<sub>2</sub> photocatalysis using the fluorescence technique. *Electrochem. Commun.*  
498 **2**, 207-210 (2000).
- 499 28 Chen, C. *et al.* High performance of anode supported BaZr<sub>0.1</sub>Ce<sub>0.7</sub>Y<sub>0.1</sub>Yb<sub>0.1</sub>O<sub>3-δ</sub> proton-  
500 conducting electrolyte micro-tubular cells with asymmetric structure for IT-SOFCs. *J.*  
501 *Electroanal. Chem.* **844**, 49-57 (2019).
- 502 29 You, S. *et al.* Monolithic Porous Magnéli-phase Ti<sub>4</sub>O<sub>7</sub> for Electro-oxidation Treatment of  
503 Industrial Wastewater. *Electrochim. Acta.* **214**, 326-335 (2016).

- 504 30 Wang, Y.-n., Chen, J., Li, X., Zhang, S. & Qiao, X. Estimation of Aqueous-Phase  
505 Reaction Rate Constants of Hydroxyl Radical with Phenols, Alkanes and Alcohols. *QSAR*  
506 *Comb. Sci.* **28**, 1309-1316 (2009).
- 507 31 Pei, S., You, S., Ma, J., Chen, X. & Ren, N. Electron spin resonance evidence for electro-  
508 generated hydroxyl radicals. *Environ. Sci. Technol.* **54**, 13333-13343 (2020).
- 509 32 Li, X. *et al.* Electro-catazone treatment of ozone-resistant drug ibuprofen: Interfacial  
510 reaction kinetics, influencing mechanisms, and degradation sites. *J. Hazard. Mater.* **4**,  
511 100023 (2021).
- 512 33 Martins, L. F. G., Parreira, M. C. B., Ramalho, J. P. P., Morgado, P. & Filipe, E. J. M.  
513 Prediction of diffusion coefficients of chlorophenols in water by computer simulation. *Fluid*  
514 *Phase Equilib.* **396**, 9-19 (2015).
- 515 34 Kapalka, A., Fóti, G. & Comninellis, C. Determination of the Tafel slope for oxygen  
516 evolution on boron-doped diamond electrodes. *Electrochem. Commun.* **10**, 607-610  
517 (2008).
- 518 35 Wen, W., Zhao, H., Zhang, S. & Pires, V. Rapid Photoelectrochemical Method for in Situ  
519 Determination of Effective Diffusion Coefficient of Organic Compounds. *J. Phys. Chem. C*  
520 **112**, 3875-3880 (2008).
- 521 36 Misal, S. N., Lin, M. H., Mehraeen, S. & Chaplin, B. P. Modeling electrochemical  
522 oxidation and reduction of sulfamethoxazole using electrocatalytic reactive  
523 electrochemical membranes. *J. Hazard. Mater.* **384**, 121420 (2020).
- 524 37 Petersen, E. E. Diffusion in a pore of varying cross section. *AIChE J.* **4**, 343-345 (1958).
- 525 38 Chen-Wiegart, Y.-c. K. *et al.* 3D morphological evolution of porous titanium by x-ray  
526 micro- and nano-tomography. *J. Mater. Res.* **28**, 2444-2452 (2013).
- 527
