# Supplementary material for: Unveiling the spatially confined oxidation processes in reactive electrochemical membranes
Source: PubMed Central journal article supplement (PMC10584896; doi:10.1038/s41467-023-42224-3), 2023-10-18
Supplement: 41467_2023_42224_MOESM3_ESM.pdf [file 41467_2023_42224_MOESM3_ESM.pdf]

## **Description of Additional Supplementary Files**

File Name: Supplementary Movie 1

Description: Visualized 4-CP distribution in simulated channels
